# Supplementary material
Source: publisher figshare collection journal article supplement (https://frontiersin.figshare.com/ndownloader/files/11205398)
Supplement: Supplementary file 1 [file 11205398]

## Sheet: Hoja1
Cruise	Station	Latitude (°S)	Longitude (°W)	Depth (m)	N2O (ppmv)	CH4 (ppmv)	Temperature (°C)	Salinity	O2 (μmol L-1)	NO3- (μmol L-1)	PO43- (μmol L-1)
CIMAR-21	3	-26.997	-71.03	0	0.171907	0.111684
CIMAR-21	3	-26.997	-71.03	0.035	0.17191	0.111819
CIMAR-21	3	-26.997	-71.03	0.049	0.17342	0.111874
CIMAR-21	3	-26.997	-71.03	0.1	0.178795	0.111828
CIMAR-21	3	-26.997	-71.03	0.13	0.178798	0.111796
CIMAR-21	3	-26.997	-71.03	0.163	0.176705	0.11177
CIMAR-21	3	-26.997	-71.03	0.198	0.174196	0.111737
CIMAR-21	3	-26.997	-71.03	0.248	0.170469	0.111688
CIMAR-21	3	-26.997	-71.03	0.283	0.170461	0.111654
CIMAR-21	3	-26.997	-71.03	0.297	0.171063	0.11164
CIMAR-21	3	-26.997	-71.03	0.348	0.17319	0.111749
CIMAR-21	3	-26.997	-71.03	0.382	0.173182	0.111823
CIMAR-21	3	-26.997	-71.03	0.41	0.173225	0.111884
CIMAR-21	3	-26.997	-71.03	0.444	0.173284	0.111959
CIMAR-21	3	-26.997	-71.03	0.494	0.173373	0.112071
CIMAR-21	3	-26.997	-71.03	0.53	0.173374	0.112149
CIMAR-21	3	-26.997	-71.03	0.5447	0.175844	0.112181
CIMAR-21	3	-26.997	-71.03	0.595	0.184591	0.112147
CIMAR-21	3	-26.997	-71.03	0.6296	0.184592	0.112125
CIMAR-21	3	-26.997	-71.03	0.656	0.181924	0.112107
CIMAR-21	3	-26.997	-71.03	0.690579	0.178651	0.112086
CIMAR-21	3	-26.997	-71.03	0.740487	0.1738	0.112054
CIMAR-21	3	-26.997	-71.03	0.775558	0.173805	0.112032
CIMAR-21	3	-26.997	-71.03	0.790395	0.174359	0.112022
CIMAR-21	3	-26.997	-71.03	0.840394	0.176221	0.112176
CIMAR-21	3	-26.997	-71.03	0.875285	0.176226	0.112283	16.017	34.834	240.892
CIMAR-21	3	-26.997	-71.03	0.901992	0.174905	0.112365
CIMAR-21	3	-26.997	-71.03	0.93486	0.173272	0.112465
CIMAR-21	3	-26.997	-71.03	0.986072	0.170725	0.112623
CIMAR-21	3	-26.997	-71.03	1.02096	0.170725	0.11273
CIMAR-21	3	-26.997	-71.03	1.03499	0.171945	0.112773
CIMAR-21	3	-26.997	-71.03	1.08616	0.176394	0.112454
CIMAR-21	3	-26.997	-71.03	1.12033	0.176395	0.112241
CIMAR-21	3	-26.997	-71.03	1.14785	0.176945	0.11207
CIMAR-21	3	-26.997	-71.03	1.18202	0.177632	0.111857
CIMAR-21	3	-26.997	-71.03	1.23364	0.178667	0.111536
CIMAR-21	3	-26.997	-71.03	1.26871	0.17867	0.111317
CIMAR-21	3	-26.997	-71.03	1.28291	0.177892	0.111229
CIMAR-21	3	-26.997	-71.03	1.33287	0.175165	0.111695
CIMAR-21	3	-26.997	-71.03	1.36695	0.175168	0.112012
CIMAR-21	3	-26.997	-71.03	1.39352	0.177806	0.11226
CIMAR-21	3	-26.997	-71.03	1.42666	0.181101	0.112569
CIMAR-21	3	-26.997	-71.03	1.47706	0.186112	0.113038
CIMAR-21	3	-26.997	-71.03	1.51186	0.186114	0.113363
CIMAR-21	3	-26.997	-71.03	1.52594	0.186483	0.113494
CIMAR-21	3	-26.997	-71.03	1.57589	0.18779	0.11327
CIMAR-21	3	-26.997	-71.03	1.60993	0.187793	0.113117
CIMAR-21	3	-26.997	-71.03	1.63686	0.186531	0.112996
CIMAR-21	3	-26.997	-71.03	1.6704	0.184958	0.112846
CIMAR-21	3	-26.997	-71.03	1.71995	0.182634	0.112624
CIMAR-21	3	-26.997	-71.03	1.75484	0.182635	0.112467
CIMAR-21	3	-26.997	-71.03	1.76909	0.180315	0.112403
CIMAR-21	3	-26.997	-71.03	1.81936	0.172135	0.112293
CIMAR-21	3	-26.997	-71.03	1.85394	0.172136	0.112218	16.028	34.835	238.895
CIMAR-21	3	-26.997	-71.03	1.88105	0.174053	0.112158
CIMAR-21	3	-26.997	-71.03	1.91432	0.176413	0.112086
CIMAR-21	3	-26.997	-71.03	1.96477	0.17999	0.111976
CIMAR-21	3	-26.997	-71.03	2.0002	0.179998	0.1119
CIMAR-21	3	-26.997	-71.03	2.01454	0.180573	0.111869
CIMAR-21	3	-26.997	-71.03	2.06513	0.182604	0.111919
CIMAR-21	3	-26.997	-71.03	2.09948	0.182611	0.111953
CIMAR-21	3	-26.997	-71.03	2.12682	0.181795	0.11198
CIMAR-21	3	-26.997	-71.03	2.16094	0.180766	0.112011
CIMAR-21	3	-26.997	-71.03	2.2126	0.179205	0.112059
CIMAR-21	3	-26.997	-71.03	2.24794	0.179199	0.112091
CIMAR-21	3	-26.997	-71.03	2.26242	0.179435	0.112104
CIMAR-21	3	-26.997	-71.03	2.31242	0.180251	0.111995
CIMAR-21	3	-26.997	-71.03	2.34628	0.180245	0.111921
CIMAR-21	3	-26.997	-71.03	2.37397	0.180193	0.111861
CIMAR-21	3	-26.997	-71.03	2.40774	0.180137	0.111788
CIMAR-21	3	-26.997	-71.03	2.45855	0.180052	0.11168
CIMAR-21	3	-26.997	-71.03	2.4933	0.180053	0.111605
CIMAR-21	3	-26.997	-71.03	2.50738	0.178846	0.111575
CIMAR-21	3	-26.997	-71.03	2.55769	0.174543	0.111576
CIMAR-21	3	-26.997	-71.03	2.59317	0.174544	0.111577
CIMAR-21	3	-26.997	-71.03	2.61974	0.174025	0.111578
CIMAR-21	3	-26.997	-71.03	2.65247	0.173394	0.11158
CIMAR-21	3	-26.997	-71.03	2.7044	0.172395	0.111583
CIMAR-21	3	-26.997	-71.03	2.74001	0.172406	0.111585
CIMAR-21	3	-26.997	-71.03	2.75449	0.172576	0.111586
CIMAR-21	3	-26.997	-71.03	2.80507	0.17317	0.111655
CIMAR-21	3	-26.997	-71.03	2.83956	0.173181	0.111702	16.021	34.835	239.432
CIMAR-21	3	-26.997	-71.03	2.86748	0.171585	0.11174
CIMAR-21	3	-26.997	-71.03	2.90093	0.169651	0.111783
CIMAR-21	3	-26.997	-71.03	2.95152	0.166734	0.111848
CIMAR-21	3	-26.997	-71.03	2.98659	0.166726	0.111893
CIMAR-21	3	-26.997	-71.03	3.00066	0.168949	0.111911
CIMAR-21	3	-26.997	-71.03	3.05151	0.176954	0.11203
CIMAR-21	3	-26.997	-71.03	3.08631	0.176946	0.112111
CIMAR-21	3	-26.997	-71.03	3.1132	0.176414	0.112174
CIMAR-21	3	-26.997	-71.03	3.14647	0.175766	0.112254
CIMAR-21	3	-26.997	-71.03	3.19706	0.174781	0.112376
CIMAR-21	3	-26.997	-71.03	3.23177	0.174783	0.112459
CIMAR-21	3	-26.997	-71.03	3.24656	0.175727	0.112495
CIMAR-21	3	-26.997	-71.03	3.29809	0.179018	0.112536
CIMAR-21	3	-26.997	-71.03	3.33271	0.179021	0.112563
CIMAR-21	3	-26.997	-71.03	3.36122	0.177881	0.112586
CIMAR-21	3	-26.997	-71.03	3.39525	0.176515	0.112612
CIMAR-21	3	-26.997	-71.03	3.44462	0.174533	0.112651
CIMAR-21	3	-26.997	-71.03	3.47951	0.17453	0.112678
CIMAR-21	3	-26.997	-71.03	3.49376	0.176371	0.112689
CIMAR-21	3	-26.997	-71.03	3.54372	0.182829	0.112287
CIMAR-21	3	-26.997	-71.03	3.57847	0.182826	0.112008
CIMAR-21	3	-26.997	-71.03	3.60559	0.182449	0.11179
CIMAR-21	3	-26.997	-71.03	3.63944	0.181985	0.111518
CIMAR-21	3	-26.997	-71.03	3.69101	0.181278	0.111106
CIMAR-21	3	-26.997	-71.03	3.72672	0.181281	0.110819
CIMAR-21	3	-26.997	-71.03	3.74061	0.179943	0.110708
CIMAR-21	3	-26.997	-71.03	3.79092	0.175094	0.110968
CIMAR-21	3	-26.997	-71.03	3.82536	0.175097	0.111146	16.03	34.835	238.427
CIMAR-21	3	-26.997	-71.03	3.85257	0.176299	0.111287
CIMAR-21	3	-26.997	-71.03	3.88588	0.177783	0.111461
CIMAR-21	3	-26.997	-71.03	3.93669	0.180042	0.111727
CIMAR-21	3	-26.997	-71.03	3.97176	0.180055	0.111909
CIMAR-21	3	-26.997	-71.03	3.98592	0.17976	0.111983
CIMAR-21	3	-26.997	-71.03	4.03669	0.178704	0.11211
CIMAR-21	3	-26.997	-71.03	4.07185	0.178717	0.112198
CIMAR-21	3	-26.997	-71.03	4.10017	0.176737	0.112269
CIMAR-21	3	-26.997	-71.03	4.1334	0.174395	0.112348
CIMAR-21	3	-26.997	-71.03	4.1843	0.170812	0.11247
CIMAR-21	3	-26.997	-71.03	4.21892	0.170802	0.112553
CIMAR-21	3	-26.997	-71.03	4.2334	0.170158	0.112588
CIMAR-21	3	-26.997	-71.03	4.28474	0.167866	0.112514
CIMAR-21	3	-26.997	-71.03	4.31932	0.167857	0.112464
CIMAR-21	3	-26.997	-71.03	4.34612	0.170035	0.112425
CIMAR-21	3	-26.997	-71.03	4.37953	0.17277	0.112379
CIMAR-21	3	-26.997	-71.03	4.42997	0.176899	0.112309
CIMAR-21	3	-26.997	-71.03	4.46446	0.176904	0.112261
CIMAR-21	3	-26.997	-71.03	4.47903	0.177893	0.112241
CIMAR-21	3	-26.997	-71.03	4.52961	0.181337	0.112574
CIMAR-21	3	-26.997	-71.03	4.56446	0.181342	0.112803
CIMAR-21	3	-26.997	-71.03	4.59238	0.178912	0.112987
CIMAR-21	3	-26.997	-71.03	4.62592	0.175997	0.113209
CIMAR-21	3	-26.997	-71.03	4.67605	0.171642	0.11354
CIMAR-21	3	-26.997	-71.03	4.71054	0.17165	0.113768
CIMAR-21	3	-26.997	-71.03	4.72461	0.173939	0.113861
CIMAR-21	3	-26.997	-71.03	4.7747	0.182085	0.113387
CIMAR-21	3	-26.997	-71.03	4.8086	0.182093	0.113065
CIMAR-21	3	-26.997	-71.03	4.83657	0.180453	0.1128	16.034	34.836	239.152	6.735	1.116
CIMAR-21	3	-26.997	-71.03	4.87056	0.178446	0.112475
CIMAR-21	3	-26.997	-71.03	4.92042	0.175508	0.112
CIMAR-21	3	-26.997	-71.03	4.95531	0.175503	0.111667
CIMAR-21	3	-26.997	-71.03	4.96952	0.174859	0.111531
CIMAR-21	3	-26.997	-71.03	5.01997	0.172561	0.111579
CIMAR-21	3	-26.997	-71.03	5.05486	0.172556	0.111612
CIMAR-21	3	-26.997	-71.03	5.08256	0.173445	0.111638
CIMAR-21	3	-26.997	-71.03	5.11682	0.174553	0.111671
CIMAR-21	3	-26.997	-71.03	5.16713	0.176181	0.111719
CIMAR-21	3	-26.997	-71.03	5.20189	0.176187	0.111753
CIMAR-21	3	-26.997	-71.03	5.21605	0.17669	0.111766
CIMAR-21	3	-26.997	-71.03	5.26681	0.178491	0.111782
CIMAR-21	3	-26.997	-71.03	5.30144	0.178497	0.111793
CIMAR-21	3	-26.997	-71.03	5.32922	0.180487	0.111802
CIMAR-21	3	-26.997	-71.03	5.36326	0.182919	0.111813
CIMAR-21	3	-26.997	-71.03	5.4138	0.186528	0.11183
CIMAR-21	3	-26.997	-71.03	5.44882	0.186527	0.111842
CIMAR-21	3	-26.997	-71.03	5.46326	0.184959	0.111847
CIMAR-21	3	-26.997	-71.03	5.51379	0.17949	0.111975
CIMAR-21	3	-26.997	-71.03	5.54886	0.179489	0.112064
CIMAR-21	3	-26.997	-71.03	5.57634	0.179137	0.112134
CIMAR-21	3	-26.997	-71.03	5.60983	0.178705	0.112217
CIMAR-21	3	-26.997	-71.03	5.66069	0.178051	0.112344
CIMAR-21	3	-26.997	-71.03	5.69571	0.17805	0.112432
CIMAR-21	3	-26.997	-71.03	5.70974	0.177383	0.112467
CIMAR-21	3	-26.997	-71.03	5.7605	0.174962	0.112652
CIMAR-21	3	-26.997	-71.03	5.79557	0.174961	0.11278
CIMAR-21	3	-26.997	-71.03	5.82341	0.177504	0.112881	16.03	34.835	240.117
CIMAR-21	3	-26.997	-71.03	5.85753	0.180618	0.113007
CIMAR-21	3	-26.997	-71.03	5.90865	0.18529	0.113195
CIMAR-21	3	-26.997	-71.03	5.94377	0.185294	0.113324
CIMAR-21	3	-26.997	-71.03	5.95811	0.183228	0.113377
CIMAR-21	3	-26.997	-71.03	6.00856	0.175931	0.113542
CIMAR-21	3	-26.997	-71.03	6.04417	0.175935	0.113658
CIMAR-21	3	-26.997	-71.03	6.0711	0.177511	0.113747
CIMAR-21	3	-26.997	-71.03	6.10406	0.179429	0.113853
CIMAR-21	3	-26.997	-71.03	6.15482	0.182379	0.114016
CIMAR-21	3	-26.997	-71.03	6.1903	0.182375	0.114131
CIMAR-21	3	-26.997	-71.03	6.20437	0.179549	0.114176
CIMAR-21	3	-26.997	-71.03	6.25505	0.169381	0.114365
CIMAR-21	3	-26.997	-71.03	6.28971	0.169378	0.114495
CIMAR-21	3	-26.997	-71.03	6.3175	0.169466	0.114598
CIMAR-21	3	-26.997	-71.03	6.35135	0.169598	0.114728
CIMAR-21	3	-26.997	-71.03	6.40257	0.169797	0.114924
CIMAR-21	3	-26.997	-71.03	6.43728	0.169818	0.115057
CIMAR-21	3	-26.997	-71.03	6.45135	0.171387	0.115111
CIMAR-21	3	-26.997	-71.03	6.50193	0.177006	0.115206
CIMAR-21	3	-26.997	-71.03	6.53642	0.177027	0.115271
CIMAR-21	3	-26.997	-71.03	6.56349	0.175719	0.115322
CIMAR-21	3	-26.997	-71.03	6.59703	0.174064	0.115381
CIMAR-21	3	-26.997	-71.03	6.64658	0.171619	0.115467
CIMAR-21	3	-26.997	-71.03	6.68147	0.171605	0.115528
CIMAR-21	3	-26.997	-71.03	6.69559	0.173002	0.115553
CIMAR-21	3	-26.997	-71.03	6.74572	0.177947	0.115488
CIMAR-21	3	-26.997	-71.03	6.77989	0.177933	0.115444
CIMAR-21	3	-26.997	-71.03	6.80777	0.179227	0.115409
CIMAR-21	3	-26.997	-71.03	6.84181	0.180823	0.115367	16.041	34.836	239.472
CIMAR-21	3	-26.997	-71.03	6.89284	0.183216	0.115304
CIMAR-21	3	-26.997	-71.03	6.92804	0.183216	0.115261
CIMAR-21	3	-26.997	-71.03	6.94207	0.180469	0.115244
CIMAR-21	3	-26.997	-71.03	6.99252	0.170578	0.115052
CIMAR-21	3	-26.997	-71.03	7.02687	0.170579	0.114922
CIMAR-21	3	-26.997	-71.03	7.05407	0.17066	0.114819
CIMAR-21	3	-26.997	-71.03	7.08762	0.170755	0.114691
CIMAR-21	3	-26.997	-71.03	7.13865	0.170901	0.114496
CIMAR-21	3	-26.997	-71.03	7.17313	0.170896	0.114364
CIMAR-21	3	-26.997	-71.03	7.18721	0.171463	0.11431
CIMAR-21	3	-26.997	-71.03	7.23761	0.17349	0.114384
CIMAR-21	3	-26.997	-71.03	7.27223	0.173485	0.114435
CIMAR-21	3	-26.997	-71.03	7.29975	0.173482	0.114476
CIMAR-21	3	-26.997	-71.03	7.3337	0.173486	0.114527
CIMAR-21	3	-26.997	-71.03	7.38432	0.173491	0.114604
CIMAR-21	3	-26.997	-71.03	7.41894	0.173493	0.114656
CIMAR-21	3	-26.997	-71.03	7.43302	0.174796	0.114678
CIMAR-21	3	-26.997	-71.03	7.48297	0.179417	0.115003
CIMAR-21	3	-26.997	-71.03	7.51714	0.179419	0.115226
CIMAR-21	3	-26.997	-71.03	7.54484	0.178668	0.115407
CIMAR-21	3	-26.997	-71.03	7.57852	0.177763	0.115627
CIMAR-21	3	-26.997	-71.03	7.62923	0.176401	0.115959
CIMAR-21	3	-26.997	-71.03	7.66403	0.176411	0.116187
CIMAR-21	3	-26.997	-71.03	7.67824	0.176823	0.11628
CIMAR-21	3	-26.997	-71.03	7.72878	0.178279	0.115908
CIMAR-21	3	-26.997	-71.03	7.76286	0.17829	0.115657
CIMAR-21	3	-26.997	-71.03	7.79033	0.177004	0.115455
CIMAR-21	3	-26.997	-71.03	7.82361	0.175438	0.115209	16.043	34.836	239.16
CIMAR-21	3	-26.997	-71.03	7.87347	0.173089	0.11484
CIMAR-21	3	-26.997	-71.03	7.9085	0.173093	0.114582
CIMAR-21	3	-26.997	-71.03	7.9223	0.173297	0.114479
CIMAR-21	3	-26.997	-71.03	7.97252	0.174038	0.114597
CIMAR-21	3	-26.997	-71.03	8.00728	0.174041	0.114679
CIMAR-21	3	-26.997	-71.03	8.033	0.173498	0.114739
CIMAR-21	3	-26.997	-71.03	8.06645	0.172795	0.114818
CIMAR-21	3	-26.997	-71.03	8.11721	0.171727	0.114938
CIMAR-21	3	-26.997	-71.03	8.1521	0.171734	0.11502
CIMAR-21	3	-26.997	-71.03	8.16627	0.170459	0.115054
CIMAR-21	3	-26.997	-71.03	8.21676	0.165894	0.115204
CIMAR-21	3	-26.997	-71.03	8.25133	0.165901	0.115307
CIMAR-21	3	-26.997	-71.03	8.27957	0.168113	0.115391
CIMAR-21	3	-26.997	-71.03	8.31356	0.170759	0.115489
CIMAR-21	3	-26.997	-71.03	8.36316	0.174621	0.115632
CIMAR-21	3	-26.997	-71.03	8.3985	0.17461	0.115734
CIMAR-21	3	-26.997	-71.03	8.4127	0.174392	0.115775
CIMAR-21	3	-26.997	-71.03	8.46477	0.173598	0.115419
CIMAR-21	3	-26.997	-71.03	8.50011	0.173587	0.115177
CIMAR-21	3	-26.997	-71.03	8.52745	0.175111	0.11499
CIMAR-21	3	-26.997	-71.03	8.56104	0.176993	0.114762
CIMAR-21	3	-26.997	-71.03	8.61162	0.179831	0.114419
CIMAR-21	3	-26.997	-71.03	8.64651	0.179832	0.114182
CIMAR-21	3	-26.997	-71.03	8.66103	0.178321	0.114083
CIMAR-21	3	-26.997	-71.03	8.71135	0.173086	0.11428
CIMAR-21	3	-26.997	-71.03	8.74552	0.173087	0.114414
CIMAR-21	3	-26.997	-71.03	8.77267	0.172508	0.11452
CIMAR-21	3	-26.997	-71.03	8.80667	0.171796	0.114655
CIMAR-21	3	-26.997	-71.03	8.85639	0.170752	0.114852	16.034	34.835	239.563	6.949	1.119
CIMAR-21	3	-26.997	-71.03	8.89088	0.170766	0.114989
CIMAR-21	3	-26.997	-71.03	8.90504	0.170039	0.115045
CIMAR-21	3	-26.997	-71.03	8.95608	0.16743	0.114866
CIMAR-21	3	-26.997	-71.03	8.99146	0.167444	0.114742
CIMAR-21	3	-26.997	-71.03	9.01893	0.168759	0.114646
CIMAR-21	3	-26.997	-71.03	9.0527	0.170365	0.114525
CIMAR-21	3	-26.997	-71.03	9.10409	0.172805	0.114341
CIMAR-21	3	-26.997	-71.03	9.13916	0.172803	0.114216
CIMAR-21	3	-26.997	-71.03	9.1531	0.171374	0.114166
CIMAR-21	3	-26.997	-71.03	9.20458	0.166095	0.114475
CIMAR-21	3	-26.997	-71.03	9.23898	0.166093	0.114682
CIMAR-21	3	-26.997	-71.03	9.26609	0.16557	0.114845
CIMAR-21	3	-26.997	-71.03	9.29883	0.164943	0.115043
CIMAR-21	3	-26.997	-71.03	9.34932	0.163977	0.115348
CIMAR-21	3	-26.997	-71.03	9.38425	0.163979	0.115559
CIMAR-21	3	-26.997	-71.03	9.39833	0.165902	0.115644
CIMAR-21	3	-26.997	-71.03	9.44815	0.172731	0.115384
CIMAR-21	3	-26.997	-71.03	9.48205	0.172733	0.115207
CIMAR-21	3	-26.997	-71.03	9.50898	0.17303	0.115066
CIMAR-21	3	-26.997	-71.03	9.54315	0.173411	0.114888
CIMAR-21	3	-26.997	-71.03	9.59414	0.173979	0.114624
CIMAR-21	3	-26.997	-71.03	9.62916	0.173986	0.114442
CIMAR-21	3	-26.997	-71.03	9.64315	0.173692	0.114369
CIMAR-21	3	-26.997	-71.03	9.69328	0.17264	0.114628
CIMAR-21	3	-26.997	-71.03	9.72813	0.172647	0.114807
CIMAR-21	3	-26.997	-71.03	9.75605	0.172622	0.114951
CIMAR-21	3	-26.997	-71.03	9.79031	0.172566	0.115124
CIMAR-21	3	-26.997	-71.03	9.84215	0.172484	0.115384	16.018	34.834	239.901
CIMAR-21	3	-26.997	-71.03	9.87839	0.172466	0.115567
CIMAR-21	3	-26.997	-71.03	9.89273	0.173151	0.115639
CIMAR-21	3	-26.997	-71.03	9.94363	0.17558	0.115442
CIMAR-21	3	-26.997	-71.03	9.97812	0.175563	0.115308
CIMAR-21	3	-26.997	-71.03	10.0053	0.175843	0.115203
CIMAR-21	3	-26.997	-71.03	10.0388	0.176215	0.115078
CIMAR-21	3	-26.997	-71.03	10.0889	0.176771	0.11489
CIMAR-21	3	-26.997	-71.03	10.1239	0.17678	0.11476
CIMAR-21	3	-26.997	-71.03	10.1378	0.175607	0.114708
CIMAR-21	3	-26.997	-71.03	10.1894	0.171269	0.11446
CIMAR-21	3	-26.997	-71.03	10.2239	0.171278	0.114294
CIMAR-21	3	-26.997	-71.03	10.2516	0.169982	0.114162
CIMAR-21	3	-26.997	-71.03	10.2854	0.168383	0.113997
CIMAR-21	3	-26.997	-71.03	10.3357	0.166007	0.113752
CIMAR-21	3	-26.997	-71.03	10.3708	0.166008	0.113581
CIMAR-21	3	-26.997	-71.03	10.3852	0.168599	0.113511
CIMAR-21	3	-26.997	-71.03	10.4362	0.177774	0.114154
CIMAR-21	3	-26.997	-71.03	10.4706	0.177775	0.114589
CIMAR-21	3	-26.997	-71.03	10.4969	0.176161	0.114921
CIMAR-21	3	-26.997	-71.03	10.5295	0.174166	0.115332
CIMAR-21	3	-26.997	-71.03	10.5792	0.171111	0.11596
CIMAR-21	3	-26.997	-71.03	10.6139	0.171111	0.116399
CIMAR-21	3	-26.997	-71.03	10.6283	0.170912	0.11658
CIMAR-21	3	-26.997	-71.03	10.6793	0.170209	0.116095
CIMAR-21	3	-26.997	-71.03	10.7141	0.170209	0.115762
CIMAR-21	3	-26.997	-71.03	10.7416	0.172985	0.1155
CIMAR-21	3	-26.997	-71.03	10.7751	0.176366	0.11518
CIMAR-21	3	-26.997	-71.03	10.8261	0.181513	0.114692
CIMAR-21	3	-26.997	-71.03	10.861	0.181509	0.114358
CIMAR-21	3	-26.997	-71.03	10.8757	0.182306	0.114218	16.036	34.835	239.989
CIMAR-21	3	-26.997	-71.03	10.9256	0.185017	0.114385
CIMAR-21	3	-26.997	-71.03	10.9596	0.185013	0.114499
CIMAR-21	3	-26.997	-71.03	10.9874	0.183279	0.114592
CIMAR-21	3	-26.997	-71.03	11.0216	0.181162	0.114708
CIMAR-21	3	-26.997	-71.03	11.0726	0.177991	0.114881
CIMAR-21	3	-26.997	-71.03	11.107	0.177994	0.114998
CIMAR-21	3	-26.997	-71.03	11.1214	0.176377	0.115047
CIMAR-21	3	-26.997	-71.03	11.1718	0.170719	0.114842
CIMAR-21	3	-26.997	-71.03	11.2064	0.170721	0.114701
CIMAR-21	3	-26.997	-71.03	11.2338	0.171884	0.11459
CIMAR-21	3	-26.997	-71.03	11.2669	0.173292	0.114456
CIMAR-21	3	-26.997	-71.03	11.3185	0.175496	0.114247
CIMAR-21	3	-26.997	-71.03	11.3541	0.175502	0.114103
CIMAR-21	3	-26.997	-71.03	11.3684	0.175305	0.114045
CIMAR-21	3	-26.997	-71.03	11.4187	0.17461	0.114359
CIMAR-21	3	-26.997	-71.03	11.4527	0.174616	0.114571
CIMAR-21	3	-26.997	-71.03	11.4809	0.175123	0.114747
CIMAR-21	3	-26.997	-71.03	11.5148	0.175731	0.114957
CIMAR-21	3	-26.997	-71.03	11.5655	0.176638	0.11527
CIMAR-21	3	-26.997	-71.03	11.6015	0.176641	0.115493
CIMAR-21	3	-26.997	-71.03	11.6158	0.177428	0.115581
CIMAR-21	3	-26.997	-71.03	11.6659	0.180203	0.115254
CIMAR-21	3	-26.997	-71.03	11.6994	0.180205	0.115035
CIMAR-21	3	-26.997	-71.03	11.7269	0.179695	0.114856
CIMAR-21	3	-26.997	-71.03	11.7609	0.179051	0.114634
CIMAR-21	3	-26.997	-71.03	11.8118	0.17809	0.114302
CIMAR-21	3	-26.997	-71.03	11.8467	0.178082	0.114073	16.011	34.834	240.297
CIMAR-21	3	-26.997	-71.03	11.861	0.176289	0.11398
CIMAR-21	3	-26.997	-71.03	11.9137	0.169667	0.114194
CIMAR-21	3	-26.997	-71.03	11.9489	0.169659	0.114337
CIMAR-21	3	-26.997	-71.03	11.9766	0.171711	0.11445
CIMAR-21	3	-26.997	-71.03	12.0103	0.174212	0.114587
CIMAR-21	3	-26.997	-71.03	12.0619	0.178048	0.114798
CIMAR-21	3	-26.997	-71.03	12.0972	0.178049	0.114942
CIMAR-21	3	-26.997	-71.03	12.1114	0.177764	0.115
CIMAR-21	3	-26.997	-71.03	12.162	0.176749	0.114876
CIMAR-21	3	-26.997	-71.03	12.1965	0.17675	0.114792
CIMAR-21	3	-26.997	-71.03	12.2237	0.174316	0.114726
CIMAR-21	3	-26.997	-71.03	12.2573	0.171315	0.114644
CIMAR-21	3	-26.997	-71.03	12.308	0.166784	0.114521
CIMAR-21	3	-26.997	-71.03	12.3432	0.166792	0.114436
CIMAR-21	3	-26.997	-71.03	12.3574	0.168202	0.114402
CIMAR-21	3	-26.997	-71.03	12.4096	0.173364	0.114576
CIMAR-21	3	-26.997	-71.03	12.4441	0.173372	0.114692
CIMAR-21	3	-26.997	-71.03	12.4716	0.173949	0.114783
CIMAR-21	3	-26.997	-71.03	12.5052	0.174655	0.114896
CIMAR-21	3	-26.997	-71.03	12.5571	0.175745	0.11507
CIMAR-21	3	-26.997	-71.03	12.5916	0.175752	0.115185
CIMAR-21	3	-26.997	-71.03	12.6055	0.17575	0.115232
CIMAR-21	3	-26.997	-71.03	12.6565	0.175744	0.115274
CIMAR-21	3	-26.997	-71.03	12.6912	0.175751	0.115303
CIMAR-21	3	-26.997	-71.03	12.718	0.172985	0.115325
CIMAR-21	3	-26.997	-71.03	12.7513	0.169533	0.115351
CIMAR-21	3	-26.997	-71.03	12.8017	0.164312	0.115391
CIMAR-21	3	-26.997	-71.03	12.8369	0.164311	0.115419	15.97	34.833	240.099	7.032	1.12
CIMAR-21	3	-26.997	-71.03	12.8513	0.163633	0.11543
CIMAR-21	3	-26.997	-71.03	12.9015	0.161259	0.11522
CIMAR-21	3	-26.997	-71.03	12.9366	0.161258	0.115073
CIMAR-21	3	-26.997	-71.03	12.9641	0.165648	0.114958
CIMAR-21	3	-26.997	-71.03	12.9978	0.171056	0.114819
CIMAR-21	3	-26.997	-71.03	13.0489	0.17924	0.114609
CIMAR-21	3	-26.997	-71.03	13.0835	0.179252	0.114466
CIMAR-21	3	-26.997	-71.03	13.0975	0.176317	0.114408
CIMAR-21	3	-26.997	-71.03	13.1483	0.165686	0.114283
CIMAR-21	3	-26.997	-71.03	13.1831	0.165697	0.114197
CIMAR-21	3	-26.997	-71.03	13.2101	0.167521	0.11413
CIMAR-21	3	-26.997	-71.03	13.2437	0.169779	0.114044
CIMAR-21	3	-26.997	-71.03	13.2933	0.173122	0.113917
CIMAR-21	3	-26.997	-71.03	13.3274	0.173117	0.11383
CIMAR-21	3	-26.997	-71.03	13.3417	0.171833	0.113793
CIMAR-21	3	-26.997	-71.03	13.392	0.167296	0.113761
CIMAR-21	3	-26.997	-71.03	13.4268	0.167291	0.113738
CIMAR-21	3	-26.997	-71.03	13.4553	0.169781	0.11372
CIMAR-21	3	-26.997	-71.03	13.4897	0.172783	0.113698
CIMAR-21	3	-26.997	-71.03	13.5411	0.177271	0.113667
CIMAR-21	3	-26.997	-71.03	13.5764	0.177274	0.113645
CIMAR-21	3	-26.997	-71.03	13.5906	0.174944	0.113637
CIMAR-21	3	-26.997	-71.03	13.6411	0.166703	0.113745
CIMAR-21	3	-26.997	-71.03	13.6756	0.166706	0.113819
CIMAR-21	3	-26.997	-71.03	13.7036	0.167463	0.113879
CIMAR-21	3	-26.997	-71.03	13.7375	0.168367	0.113951
CIMAR-21	3	-26.997	-71.03	13.7875	0.169699	0.114056
CIMAR-21	3	-26.997	-71.03	13.822	0.169692	0.114129
CIMAR-21	3	-26.997	-71.03	13.836	0.170857	0.114158	15.929	34.833	240.441
CIMAR-21	3	-26.997	-71.03	13.8862	0.175029	0.11455
CIMAR-21	3	-26.997	-71.03	13.9209	0.175021	0.114821
CIMAR-21	3	-26.997	-71.03	13.9487	0.174031	0.115038
CIMAR-21	3	-26.997	-71.03	13.982	0.172857	0.115301
CIMAR-21	3	-26.997	-71.03	14.0336	0.171042	0.115707
CIMAR-21	3	-26.997	-71.03	14.0688	0.171051	0.115984
CIMAR-21	3	-26.997	-71.03	14.0828	0.170141	0.116094
CIMAR-21	3	-26.997	-71.03	14.1335	0.166843	0.115842
CIMAR-21	3	-26.997	-71.03	14.1682	0.166852	0.115669
CIMAR-21	3	-26.997	-71.03	14.1959	0.167414	0.115531
CIMAR-21	3	-26.997	-71.03	14.2298	0.168091	0.115361
CIMAR-21	3	-26.997	-71.03	14.2808	0.169113	0.115106
CIMAR-21	3	-26.997	-71.03	14.3161	0.169113	0.114929
CIMAR-21	3	-26.997	-71.03	14.3305	0.168407	0.114857
CIMAR-21	3	-26.997	-71.03	14.3815	0.165895	0.114845
CIMAR-21	3	-26.997	-71.03	14.4156	0.165896	0.114838
CIMAR-21	3	-26.997	-71.03	14.4429	0.164727	0.114832
CIMAR-21	3	-26.997	-71.03	14.476	0.163313	0.114824
CIMAR-21	3	-26.997	-71.03	14.5267	0.16115	0.114813
CIMAR-21	3	-26.997	-71.03	14.5625	0.161153	0.114805
CIMAR-21	3	-26.997	-71.03	14.577	0.16159	0.114801
CIMAR-21	3	-26.997	-71.03	14.6277	0.16311	0.114778
CIMAR-21	3	-26.997	-71.03	14.6624	0.163113	0.114761
CIMAR-21	3	-26.997	-71.03	14.69	0.161808	0.114748
CIMAR-21	3	-26.997	-71.03	14.7243	0.160185	0.114731
CIMAR-21	3	-26.997	-71.03	14.775	0.157777	0.114705
CIMAR-21	3	-26.997	-71.03	14.8099	0.157773	0.114688
CIMAR-21	3	-26.997	-71.03	14.8242	0.159922	0.11468	15.898	34.833	240.239
CIMAR-21	3	-26.997	-71.03	14.8752	0.167602	0.115117
CIMAR-21	3	-26.997	-71.03	14.9094	0.167597	0.115411
CIMAR-21	3	-26.997	-71.03	14.937	0.168118	0.115648
CIMAR-21	3	-26.997	-71.03	14.9707	0.16877	0.115941
CIMAR-21	3	-26.997	-71.03	15.0222	0.169768	0.116389
CIMAR-21	3	-26.997	-71.03	15.0572	0.169781	0.116693
CIMAR-21	3	-26.997	-71.03	15.0712	0.169545	0.116815
CIMAR-21	3	-26.997	-71.03	15.1208	0.168708	0.116526
CIMAR-21	3	-26.997	-71.03	15.1544	0.168719	0.11633
CIMAR-21	3	-26.997	-71.03	15.1818	0.1681	0.11617
CIMAR-21	3	-26.997	-71.03	15.2152	0.167339	0.115974
CIMAR-21	3	-26.997	-71.03	15.2662	0.166174	0.115673
CIMAR-21	3	-26.997	-71.03	15.3019	0.166178	0.115463
CIMAR-21	3	-26.997	-71.03	15.3159	0.166875	0.11538
CIMAR-21	3	-26.997	-71.03	15.3667	0.169391	0.115588
CIMAR-21	3	-26.997	-71.03	15.4014	0.169396	0.11573
CIMAR-21	3	-26.997	-71.03	15.4293	0.170127	0.115845
CIMAR-21	3	-26.997	-71.03	15.4631	0.170997	0.115981
CIMAR-21	3	-26.997	-71.03	15.5136	0.172297	0.116185
CIMAR-21	3	-26.997	-71.03	15.5486	0.172287	0.116327
CIMAR-21	3	-26.997	-71.03	15.5627	0.171909	0.116384
CIMAR-21	3	-26.997	-71.03	15.6134	0.170553	0.116647
CIMAR-21	3	-26.997	-71.03	15.6484	0.170543	0.116829
CIMAR-21	3	-26.997	-71.03	15.6756	0.171078	0.11697
CIMAR-21	3	-26.997	-71.03	15.709	0.171757	0.117148
CIMAR-21	3	-26.997	-71.03	15.7597	0.172792	0.117416
CIMAR-21	3	-26.997	-71.03	15.7938	0.172809	0.117597
CIMAR-21	3	-26.997	-71.03	15.8081	0.171958	0.117672
CIMAR-21	3	-26.997	-71.03	15.8598	0.168886	0.118908	15.848	34.833	239.655
CIMAR-21	3	-26.997	-71.03	15.8942	0.168903	0.119732
CIMAR-21	3	-26.997	-71.03	15.9214	0.169009	0.120383
CIMAR-21	3	-26.997	-71.03	15.9551	0.169127	0.121186
CIMAR-21	3	-26.997	-71.03	16.0061	0.169301	0.122402
CIMAR-21	3	-26.997	-71.03	16.0414	0.169302	0.123243
CIMAR-21	3	-26.997	-71.03	16.0555	0.169407	0.123581
CIMAR-21	3	-26.997	-71.03	16.1052	0.169778	0.123096
CIMAR-21	3	-26.997	-71.03	16.1399	0.169778	0.122758
CIMAR-21	3	-26.997	-71.03	16.1678	0.17216	0.122486
CIMAR-21	3	-26.997	-71.03	16.2016	0.175056	0.122158
CIMAR-21	3	-26.997	-71.03	16.2511	0.179288	0.12168
CIMAR-21	3	-26.997	-71.03	16.2856	0.1793	0.121345
CIMAR-21	3	-26.997	-71.03	16.3	0.178758	0.121206
CIMAR-21	3	-26.997	-71.03	16.3514	0.176824	0.120851
CIMAR-21	3	-26.997	-71.03	16.386	0.176836	0.120611
CIMAR-21	3	-26.997	-71.03	16.4137	0.175806	0.12042
CIMAR-21	3	-26.997	-71.03	16.4472	0.174532	0.120184
CIMAR-21	3	-26.997	-71.03	16.4977	0.172619	0.119829
CIMAR-21	3	-26.997	-71.03	16.5323	0.172603	0.119585
CIMAR-21	3	-26.997	-71.03	16.5467	0.171736	0.119484
CIMAR-21	3	-26.997	-71.03	16.597	0.168706	0.119594
CIMAR-21	3	-26.997	-71.03	16.6315	0.16869	0.11967
CIMAR-21	3	-26.997	-71.03	16.6591	0.169948	0.119731
CIMAR-21	3	-26.997	-71.03	16.6929	0.171505	0.119809
CIMAR-21	3	-26.997	-71.03	16.7438	0.173851	0.119926
CIMAR-21	3	-26.997	-71.03	16.779	0.173856	0.120007
CIMAR-21	3	-26.997	-71.03	16.7932	0.173597	0.12004
CIMAR-21	3	-26.997	-71.03	16.8441	0.172667	0.120121	15.808	34.833	240.692	7.157	1.125
CIMAR-21	3	-26.997	-71.03	16.8788	0.172672	0.120177
CIMAR-21	3	-26.997	-71.03	16.9062	0.173021	0.120221
CIMAR-21	3	-26.997	-71.03	16.9394	0.173449	0.120274
CIMAR-21	3	-26.997	-71.03	16.99	0.174099	0.120355
CIMAR-21	3	-26.997	-71.03	17.025	0.174107	0.120411
CIMAR-21	3	-26.997	-71.03	17.0392	0.174777	0.120433
CIMAR-21	3	-26.997	-71.03	17.0897	0.177157	0.120266
CIMAR-21	3	-26.997	-71.03	17.1246	0.177165	0.120151
CIMAR-21	3	-26.997	-71.03	17.1514	0.176648	0.120062
CIMAR-21	3	-26.997	-71.03	17.1845	0.176003	0.11995
CIMAR-21	3	-26.997	-71.03	17.2354	0.17501	0.119779
CIMAR-21	3	-26.997	-71.03	17.2712	0.175008	0.119659
CIMAR-21	3	-26.997	-71.03	17.2852	0.175092	0.119611
CIMAR-21	3	-26.997	-71.03	17.3359	0.175399	0.119313
CIMAR-21	3	-26.997	-71.03	17.3708	0.175397	0.119108
CIMAR-21	3	-26.997	-71.03	17.3985	0.173443	0.118945
CIMAR-21	3	-26.997	-71.03	17.4327	0.171029	0.118744
CIMAR-21	3	-26.997	-71.03	17.4835	0.167445	0.118446
CIMAR-21	3	-26.997	-71.03	17.5194	0.167446	0.118236
CIMAR-21	3	-26.997	-71.03	17.5336	0.168992	0.118152
CIMAR-21	3	-26.997	-71.03	17.5845	0.174524	0.118615
CIMAR-21	3	-26.997	-71.03	17.6194	0.174525	0.118933
CIMAR-21	3	-26.997	-71.03	17.6455	0.172356	0.119171
CIMAR-21	3	-26.997	-71.03	17.6785	0.169619	0.11947
CIMAR-21	3	-26.997	-71.03	17.73	0.165339	0.119939
CIMAR-21	3	-26.997	-71.03	17.7651	0.165339	0.120258
CIMAR-21	3	-26.997	-71.03	17.7792	0.168232	0.120386
CIMAR-21	3	-26.997	-71.03	17.8301	0.178695	0.119886	15.799	34.832	240.418
CIMAR-21	3	-26.997	-71.03	17.8653	0.178694	0.119539
CIMAR-21	3	-26.997	-71.03	17.893	0.178853	0.119268
CIMAR-21	3	-26.997	-71.03	17.9267	0.17904	0.118936
CIMAR-21	3	-26.997	-71.03	17.9763	0.179315	0.118449
CIMAR-21	3	-26.997	-71.03	18.0113	0.179308	0.118104
CIMAR-21	3	-26.997	-71.03	18.026	0.178871	0.117961
CIMAR-21	3	-26.997	-71.03	18.0767	0.177351	0.117807
CIMAR-21	3	-26.997	-71.03	18.1116	0.177344	0.117701
CIMAR-21	3	-26.997	-71.03	18.1389	0.175276	0.117618
CIMAR-21	3	-26.997	-71.03	18.1724	0.17277	0.117517
CIMAR-21	3	-26.997	-71.03	18.2229	0.168968	0.117364
CIMAR-21	3	-26.997	-71.03	18.258	0.168973	0.117258
CIMAR-21	3	-26.997	-71.03	18.2723	0.169884	0.117214
CIMAR-21	3	-26.997	-71.03	18.3223	0.17304	0.117181
CIMAR-21	3	-26.997	-71.03	18.3564	0.173044	0.117159
CIMAR-21	3	-26.997	-71.03	18.383	0.171563	0.117141
CIMAR-21	3	-26.997	-71.03	18.4164	0.1697	0.117121
CIMAR-21	3	-26.997	-71.03	18.4655	0.166971	0.117091
CIMAR-21	3	-26.997	-71.03	18.4999	0.166977	0.11707
CIMAR-21	3	-26.997	-71.03	18.5142	0.166421	0.117061
CIMAR-21	3	-26.997	-71.03	18.5646	0.164447	0.11717
CIMAR-21	3	-26.997	-71.03	18.5994	0.164453	0.117246
CIMAR-21	3	-26.997	-71.03	18.6267	0.16692	0.117305
CIMAR-21	3	-26.997	-71.03	18.6603	0.169948	0.117376
CIMAR-21	3	-26.997	-71.03	18.7111	0.174523	0.117483
CIMAR-21	3	-26.997	-71.03	18.7457	0.174517	0.117555
CIMAR-21	3	-26.997	-71.03	18.7601	0.176148	0.117586
CIMAR-21	3	-26.997	-71.03	18.8097	0.181775	0.117331
CIMAR-21	3	-26.997	-71.03	18.8443	0.18177	0.117154	15.78	34.832	240.184
CIMAR-21	3	-26.997	-71.03	18.8716	0.178746	0.117014
CIMAR-21	3	-26.997	-71.03	18.905	0.175068	0.116845
CIMAR-21	3	-26.997	-71.03	18.9563	0.169423	0.116585
CIMAR-21	3	-26.997	-71.03	18.991	0.169435	0.11641
CIMAR-21	3	-26.997	-71.03	19.0052	0.168699	0.116338
CIMAR-21	3	-26.997	-71.03	19.056	0.16607	0.116312
CIMAR-21	3	-26.997	-71.03	19.0907	0.166082	0.116294
CIMAR-21	3	-26.997	-71.03	19.1179	0.16617	0.11628
CIMAR-21	3	-26.997	-71.03	19.1519	0.16625	0.116257
CIMAR-21	3	-26.997	-71.03	19.2033	0.166371	0.116223
CIMAR-21	3	-26.997	-71.03	19.239	0.166352	0.1162
CIMAR-21	3	-26.997	-71.03	19.2532	0.168425	0.11619
CIMAR-21	3	-26.997	-71.03	19.3037	0.175758	0.116246
CIMAR-21	3	-26.997	-71.03	19.3378	0.17574	0.116283
CIMAR-21	3	-26.997	-71.03	19.3648	0.174067	0.116313
CIMAR-21	3	-26.997	-71.03	19.3983	0.172021	0.116357
CIMAR-21	3	-26.997	-71.03	19.4491	0.168924	0.116424
CIMAR-21	3	-26.997	-71.03	19.4853	0.168947	0.116472
CIMAR-21	3	-26.997	-71.03	19.4994	0.168731	0.116491
CIMAR-21	3	-26.997	-71.03	19.55	0.167959	0.116189
CIMAR-21	3	-26.997	-71.03	19.5848	0.16798	0.115981
CIMAR-21	3	-26.997	-71.03	19.6126	0.167983	0.115816
CIMAR-21	3	-26.997	-71.03	19.6463	0.167974	0.115613
CIMAR-21	3	-26.997	-71.03	19.6971	0.167962	0.115306
CIMAR-21	3	-26.997	-71.03	19.7321	0.167973	0.115096
CIMAR-21	3	-26.997	-71.03	19.7463	0.169483	0.11501
CIMAR-21	3	-26.997	-71.03	19.7971	0.174886	0.114977
CIMAR-21	3	-26.997	-71.03	19.8314	0.174896	0.114954	15.767	34.832	240.192
CIMAR-21	3	-26.997	-71.03	19.8584	0.175508	0.114937
CIMAR-21	3	-26.997	-71.03	19.892	0.17623	0.114909
CIMAR-21	3	-26.997	-71.03	19.9427	0.177318	0.114866
CIMAR-21	3	-26.997	-71.03	19.9783	0.177286	0.114836
CIMAR-21	3	-26.997	-71.03	19.9925	0.176733	0.114824
CIMAR-21	3	-26.997	-71.03	20.0433	0.174746	0.115369
CIMAR-21	3	-26.997	-71.03	20.0781	0.174715	0.115741
CIMAR-21	3	-26.997	-71.03	20.1068	0.175199	0.116048
CIMAR-21	3	-26.997	-71.03	20.1406	0.175818	0.116417
CIMAR-21	3	-26.997	-71.03	20.1916	0.17675	0.116974
CIMAR-21	3	-26.997	-71.03	20.226	0.176768	0.117349
CIMAR-21	3	-26.997	-71.03	20.2402	0.174231	0.117503
CIMAR-21	3	-26.997	-71.03	20.2905	0.165209	0.117253
CIMAR-21	3	-26.997	-71.03	20.3248	0.165226	0.117081
CIMAR-21	3	-26.997	-71.03	20.3524	0.168677	0.116944
CIMAR-21	3	-26.997	-71.03	20.3862	0.172873	0.116774
CIMAR-21	3	-26.997	-71.03	20.4373	0.179234	0.116517
CIMAR-21	3	-26.997	-71.03	20.4725	0.179239	0.11634
CIMAR-21	3	-26.997	-71.03	20.487	0.178275	0.116267
CIMAR-21	3	-26.997	-71.03	20.5378	0.174902	0.115996
CIMAR-21	3	-26.997	-71.03	20.5729	0.174907	0.115809
CIMAR-21	3	-26.997	-71.03	20.6012	0.173103	0.115658
CIMAR-21	3	-26.997	-71.03	20.6358	0.17089	0.115472
CIMAR-21	3	-26.997	-71.03	20.6857	0.167702	0.115205
CIMAR-21	3	-26.997	-71.03	20.7206	0.167703	0.115018
CIMAR-21	3	-26.997	-71.03	20.7349	0.171093	0.114942
CIMAR-21	3	-26.997	-71.03	20.7866	0.183402	0.114993
CIMAR-21	3	-26.997	-71.03	20.8226	0.183403	0.115029
CIMAR-21	3	-26.997	-71.03	20.8498	0.181423	0.115057	15.741	34.832	240.014
CIMAR-21	3	-26.997	-71.03	20.8833	0.178976	0.115088
CIMAR-21	3	-26.997	-71.03	20.9339	0.175277	0.115136
CIMAR-21	3	-26.997	-71.03	20.9685	0.175267	0.115168
CIMAR-21	3	-26.997	-71.03	20.9825	0.175586	0.115181
CIMAR-21	3	-26.997	-71.03	21.0331	0.176742	0.115306
CIMAR-21	3	-26.997	-71.03	21.0682	0.176731	0.115393
CIMAR-21	3	-26.997	-71.03	21.0963	0.17745	0.115462
CIMAR-21	3	-26.997	-71.03	21.1298	0.178325	0.115548
CIMAR-21	3	-26.997	-71.03	21.1806	0.179655	0.115678
CIMAR-21	3	-26.997	-71.03	21.2158	0.179664	0.115768
CIMAR-21	3	-26.997	-71.03	21.2301	0.178671	0.115804
CIMAR-21	3	-26.997	-71.03	21.2824	0.175051	0.115636
CIMAR-21	3	-26.997	-71.03	21.3168	0.17506	0.115526
CIMAR-21	3	-26.997	-71.03	21.3443	0.177249	0.115437
CIMAR-21	3	-26.997	-71.03	21.3782	0.179923	0.115327
CIMAR-21	3	-26.997	-71.03	21.4285	0.183898	0.115163
CIMAR-21	3	-26.997	-71.03	21.4632	0.183893	0.11505
CIMAR-21	3	-26.997	-71.03	21.4773	0.182989	0.115004
CIMAR-21	3	-26.997	-71.03	21.5274	0.179769	0.114838
CIMAR-21	3	-26.997	-71.03	21.562	0.179764	0.114723
CIMAR-21	3	-26.997	-71.03	21.5898	0.180173	0.11463
CIMAR-21	3	-26.997	-71.03	21.6236	0.180685	0.11452
CIMAR-21	3	-26.997	-71.03	21.6744	0.181455	0.114355
CIMAR-21	3	-26.997	-71.03	21.709	0.181466	0.114242
CIMAR-21	3	-26.997	-71.03	21.7234	0.179716	0.114196
CIMAR-21	3	-26.997	-71.03	21.7739	0.173566	0.114259
CIMAR-21	3	-26.997	-71.03	21.8088	0.173578	0.114303
CIMAR-21	3	-26.997	-71.03	21.8358	0.175596	0.114336	15.736	34.833	239.692	7.623	1.12
CIMAR-21	3	-26.997	-71.03	21.8692	0.178054	0.114372
CIMAR-21	3	-26.997	-71.03	21.9199	0.181799	0.114426
CIMAR-21	3	-26.997	-71.03	21.9546	0.181779	0.114463
CIMAR-21	3	-26.997	-71.03	21.969	0.181856	0.114479
CIMAR-21	3	-26.997	-71.03	22.0204	0.182132	0.114257
CIMAR-21	3	-26.997	-71.03	22.0544	0.182112	0.114109
CIMAR-21	3	-26.997	-71.03	22.0819	0.181189	0.113991
CIMAR-21	3	-26.997	-71.03	22.1161	0.180065	0.113849
CIMAR-21	3	-26.997	-71.03	22.1679	0.178356	0.113633
CIMAR-21	3	-26.997	-71.03	22.2029	0.17836	0.113487
CIMAR-21	3	-26.997	-71.03	22.2168	0.176902	0.113429
CIMAR-21	3	-26.997	-71.03	22.2677	0.171582	0.113467
CIMAR-21	3	-26.997	-71.03	22.3022	0.171585	0.113492
CIMAR-21	3	-26.997	-71.03	22.329	0.17014	0.113511
CIMAR-21	3	-26.997	-71.03	22.3629	0.168315	0.113534
CIMAR-21	3	-26.997	-71.03	22.4139	0.165567	0.113569
CIMAR-21	3	-26.997	-71.03	22.4484	0.165565	0.113593
CIMAR-21	3	-26.997	-71.03	22.4624	0.167295	0.113602
CIMAR-21	3	-26.997	-71.03	22.5131	0.173572	0.113814
CIMAR-21	3	-26.997	-71.03	22.5473	0.173569	0.113957
CIMAR-21	3	-26.997	-71.03	22.5745	0.172517	0.114071
CIMAR-21	3	-26.997	-71.03	22.6077	0.171242	0.114211
CIMAR-21	3	-26.997	-71.03	22.6579	0.169312	0.114423
CIMAR-21	3	-26.997	-71.03	22.6934	0.169318	0.114573
CIMAR-21	3	-26.997	-71.03	22.7076	0.17206	0.114633
CIMAR-21	3	-26.997	-71.03	22.7584	0.181875	0.11457
CIMAR-21	3	-26.997	-71.03	22.7921	0.181881	0.114528
CIMAR-21	3	-26.997	-71.03	22.8199	0.179696	0.114494
CIMAR-21	3	-26.997	-71.03	22.8535	0.177053	0.114452	15.732	34.833	240.1
CIMAR-21	3	-26.997	-71.03	22.9036	0.17312	0.114389
CIMAR-21	3	-26.997	-71.03	22.938	0.173127	0.114346
CIMAR-21	3	-26.997	-71.03	22.9523	0.173451	0.114328
CIMAR-21	3	-26.997	-71.03	23.0033	0.174606	0.114488
CIMAR-21	3	-26.997	-71.03	23.0379	0.174613	0.114597
CIMAR-21	3	-26.997	-71.03	23.0654	0.176614	0.114683
CIMAR-21	3	-26.997	-71.03	23.099	0.17907	0.11479
CIMAR-21	3	-26.997	-71.03	23.1494	0.182741	0.11495
CIMAR-21	3	-26.997	-71.03	23.1837	0.18275	0.115059
CIMAR-21	3	-26.997	-71.03	23.1979	0.181385	0.115104
CIMAR-21	3	-26.997	-71.03	23.2484	0.176559	0.115057
CIMAR-21	3	-26.997	-71.03	23.2824	0.176567	0.115026
CIMAR-21	3	-26.997	-71.03	23.3101	0.17677	0.115
CIMAR-21	3	-26.997	-71.03	23.3438	0.176994	0.114965
CIMAR-21	3	-26.997	-71.03	23.3941	0.177331	0.114913
CIMAR-21	3	-26.997	-71.03	23.4292	0.177318	0.114876
CIMAR-21	3	-26.997	-71.03	23.4435	0.174607	0.114861
CIMAR-21	3	-26.997	-71.03	23.4952	0.164794	0.114699
CIMAR-21	3	-26.997	-71.03	23.5308	0.164782	0.114588
CIMAR-21	3	-26.997	-71.03	23.5584	0.165928	0.114501
CIMAR-21	3	-26.997	-71.03	23.5918	0.167326	0.1144
CIMAR-21	3	-26.997	-71.03	23.6426	0.169456	0.114246
CIMAR-21	3	-26.997	-71.03	23.6773	0.169462	0.114141
CIMAR-21	3	-26.997	-71.03	23.6917	0.171686	0.114098
CIMAR-21	3	-26.997	-71.03	23.7427	0.179622	0.114086
CIMAR-21	3	-26.997	-71.03	23.778	0.179628	0.114079
CIMAR-21	3	-26.997	-71.03	23.8045	0.177617	0.114073
CIMAR-21	3	-26.997	-71.03	23.8374	0.175111	0.114064	15.73	34.834	240.071
CIMAR-21	3	-26.997	-71.03	23.8889	0.171173	0.11405
CIMAR-21	3	-26.997	-71.03	23.9243	0.171165	0.11404
CIMAR-21	3	-26.997	-71.03	23.9384	0.170703	0.114036
CIMAR-21	3	-26.997	-71.03	23.9884	0.169076	0.113995
CIMAR-21	3	-26.997	-71.03	24.0224	0.169068	0.113967
CIMAR-21	3	-26.997	-71.03	24.0493	0.169707	0.113945
CIMAR-21	3	-26.997	-71.03	24.0822	0.170499	0.113919
CIMAR-21	3	-26.997	-71.03	24.1336	0.171737	0.113878
CIMAR-21	3	-26.997	-71.03	24.1686	0.171743	0.11385
CIMAR-21	3	-26.997	-71.03	24.183	0.173584	0.113839
CIMAR-21	3	-26.997	-71.03	24.2337	0.180105	0.113838
CIMAR-21	3	-26.997	-71.03	24.2682	0.180111	0.113838
CIMAR-21	3	-26.997	-71.03	24.2961	0.178192	0.113838
CIMAR-21	3	-26.997	-71.03	24.3297	0.17589	0.113838
CIMAR-21	3	-26.997	-71.03	24.3788	0.172509	0.113837
CIMAR-21	3	-26.997	-71.03	24.4131	0.172508	0.113837
CIMAR-21	3	-26.997	-71.03	24.4273	0.172766	0.113837
CIMAR-21	3	-26.997	-71.03	24.4785	0.173696	0.113967
CIMAR-21	3	-26.997	-71.03	24.514	0.173695	0.114057
CIMAR-21	3	-26.997	-71.03	24.5415	0.174616	0.114127
CIMAR-21	3	-26.997	-71.03	24.5749	0.175744	0.114212
CIMAR-21	3	-26.997	-71.03	24.6255	0.177452	0.114342
CIMAR-21	3	-26.997	-71.03	24.6601	0.177458	0.11443
CIMAR-21	3	-26.997	-71.03	24.6744	0.177012	0.114467
CIMAR-21	3	-26.997	-71.03	24.7247	0.175443	0.114322
CIMAR-21	3	-26.997	-71.03	24.7591	0.175449	0.114223
CIMAR-21	3	-26.997	-71.03	24.7858	0.176283	0.114146
CIMAR-21	3	-26.997	-71.03	24.8196	0.177323	0.114047	15.73	34.836	240.094
CIMAR-21	3	-26.997	-71.03	24.8713	0.178919	0.113894
CIMAR-21	3	-26.997	-71.03	24.907	0.178909	0.113789
CIMAR-21	3	-26.997	-71.03	24.921	0.177658	0.113748
CIMAR-21	3	-26.997	-71.03	24.9708	0.173184	0.113909
CIMAR-21	3	-26.997	-71.03	25.0053	0.173175	0.11402
CIMAR-21	3	-26.997	-71.03	25.0328	0.172259	0.114109
CIMAR-21	3	-26.997	-71.03	25.0669	0.171145	0.114222
CIMAR-21	3	-26.997	-71.03	25.1167	0.169514	0.114388
CIMAR-21	3	-26.997	-71.03	25.1515	0.169525	0.114504
CIMAR-21	3	-26.997	-71.03	25.1657	0.171896	0.114551
CIMAR-21	3	-26.997	-71.03	25.2165	0.180352	0.114589
CIMAR-21	3	-26.997	-71.03	25.2512	0.180362	0.114616
CIMAR-21	3	-26.997	-71.03	25.2782	0.181527	0.114636
CIMAR-21	3	-26.997	-71.03	25.3114	0.182941	0.114659
CIMAR-21	3	-26.997	-71.03	25.3612	0.185066	0.114693
CIMAR-21	3	-26.997	-71.03	25.3963	0.18506	0.114717
CIMAR-21	3	-26.997	-71.03	25.4105	0.183239	0.114726
CIMAR-21	3	-26.997	-71.03	25.4605	0.176812	0.114541
CIMAR-21	3	-26.997	-71.03	25.4948	0.176807	0.114414
CIMAR-21	3	-26.997	-71.03	25.5225	0.177054	0.114311
CIMAR-21	3	-26.997	-71.03	25.5563	0.177369	0.114188
CIMAR-21	3	-26.997	-71.03	25.6076	0.177847	0.114002
CIMAR-21	3	-26.997	-71.03	25.6432	0.177856	0.113872
CIMAR-21	3	-26.997	-71.03	25.6573	0.17684	0.113821
CIMAR-21	3	-26.997	-71.03	25.7076	0.173207	0.113926
CIMAR-21	3	-26.997	-71.03	25.7428	0.173216	0.114
CIMAR-21	3	-26.997	-71.03	25.7707	0.172845	0.114059
CIMAR-21	3	-26.997	-71.03	25.8045	0.172381	0.114127
CIMAR-21	3	-26.997	-71.03	25.8549	0.171689	0.11423	15.73	34.836	239.507	7.175	1.117
CIMAR-21	3	-26.997	-71.03	25.8898	0.171684	0.114301
CIMAR-21	3	-26.997	-71.03	25.904	0.173957	0.11433
CIMAR-21	3	-26.997	-71.03	25.9547	0.18207	0.114376
CIMAR-21	3	-26.997	-71.03	25.9906	0.182065	0.114408
CIMAR-21	3	-26.997	-71.03	26.0176	0.180899	0.114433
CIMAR-21	3	-26.997	-71.03	26.0514	0.179444	0.114464
CIMAR-21	3	-26.997	-71.03	26.1028	0.17723	0.114512
CIMAR-21	3	-26.997	-71.03	26.1379	0.177225	0.114544
CIMAR-21	3	-26.997	-71.03	26.1523	0.176633	0.114557
CIMAR-21	3	-26.997	-71.03	26.2028	0.174555	0.114503
CIMAR-21	3	-26.997	-71.03	26.2374	0.17455	0.114466
CIMAR-21	3	-26.997	-71.03	26.2651	0.17484	0.114436
CIMAR-21	3	-26.997	-71.03	26.2986	0.1752	0.114401
CIMAR-21	3	-26.997	-71.03	26.3526	0.175778	0.114346
CIMAR-21	3	-26.997	-71.03	26.39	0.175783	0.114307
CIMAR-21	3	-26.997	-71.03	26.4042	0.176192	0.114292
CIMAR-21	3	-26.997	-71.03	26.4549	0.177651	0.11413
CIMAR-21	3	-26.997	-71.03	26.4892	0.177655	0.11402
CIMAR-21	3	-26.997	-71.03	26.5171	0.178016	0.113931
CIMAR-21	3	-26.997	-71.03	26.5507	0.178448	0.113821
CIMAR-21	3	-26.997	-71.03	26.6015	0.179098	0.113656
CIMAR-21	3	-26.997	-71.03	26.6374	0.179097	0.113538
CIMAR-21	3	-26.997	-71.03	26.6514	0.179053	0.113493
CIMAR-21	3	-26.997	-71.03	26.7021	0.178895	0.113827
CIMAR-21	3	-26.997	-71.03	26.7361	0.178894	0.114052
CIMAR-21	3	-26.997	-71.03	26.7636	0.179072	0.114233
CIMAR-21	3	-26.997	-71.03	26.7974	0.179303	0.11446
CIMAR-21	3	-26.997	-71.03	26.8486	0.179655	0.114803	15.731	34.836	240.474
CIMAR-21	3	-26.997	-71.03	26.8841	0.179667	0.115041
CIMAR-21	3	-26.997	-71.03	26.8984	0.177533	0.115136
CIMAR-21	3	-26.997	-71.03	26.949	0.169928	0.115086
CIMAR-21	3	-26.997	-71.03	26.9835	0.16994	0.115052
CIMAR-21	3	-26.997	-71.03	27.0115	0.171759	0.115024
CIMAR-21	3	-26.997	-71.03	27.0458	0.173959	0.114987
CIMAR-21	3	-26.997	-71.03	27.097	0.177253	0.114931
CIMAR-21	3	-26.997	-71.03	27.1324	0.177243	0.114892
CIMAR-21	3	-26.997	-71.03	27.1467	0.178021	0.114877
CIMAR-21	3	-26.997	-71.03	27.1974	0.180794	0.114496
CIMAR-21	3	-26.997	-71.03	27.2326	0.180784	0.114233
CIMAR-21	3	-26.997	-71.03	27.2598	0.179841	0.114029
CIMAR-21	3	-26.997	-71.03	27.2931	0.178701	0.113781
CIMAR-21	3	-26.997	-71.03	27.3446	0.17694	0.113398
CIMAR-21	3	-26.997	-71.03	27.3805	0.176944	0.113132
CIMAR-21	3	-26.997	-71.03	27.3948	0.177833	0.113024
CIMAR-21	3	-26.997	-71.03	27.4455	0.180961	0.113337
CIMAR-21	3	-26.997	-71.03	27.4795	0.180965	0.113547
CIMAR-21	3	-26.997	-71.03	27.5074	0.178054	0.113719
CIMAR-21	3	-26.997	-71.03	27.5417	0.174473	0.11393
CIMAR-21	3	-26.997	-71.03	27.5924	0.169163	0.114243
CIMAR-21	3	-26.997	-71.03	27.6284	0.169163	0.114464
CIMAR-21	3	-26.997	-71.03	27.6428	0.170102	0.114552
CIMAR-21	3	-26.997	-71.03	27.6933	0.173399	0.11465
CIMAR-21	3	-26.997	-71.03	27.7278	0.173399	0.114717
CIMAR-21	3	-26.997	-71.03	27.7552	0.174369	0.114771
CIMAR-21	3	-26.997	-71.03	27.7886	0.175549	0.114835
CIMAR-21	3	-26.997	-71.03	27.8389	0.177326	0.114932	15.731	34.838	239.645
CIMAR-21	3	-26.997	-71.03	27.8738	0.177322	0.114999
CIMAR-21	3	-26.997	-71.03	27.8878	0.177264	0.115026
CIMAR-21	3	-26.997	-71.03	27.9381	0.177056	0.114867
CIMAR-21	3	-26.997	-71.03	27.9726	0.177052	0.114758
CIMAR-21	3	-26.997	-71.03	28.0002	0.176843	0.114671
CIMAR-21	3	-26.997	-71.03	28.0338	0.176604	0.114566
CIMAR-21	3	-26.997	-71.03	28.0846	0.176243	0.114409
CIMAR-21	3	-26.997	-71.03	28.12	0.176254	0.1143
CIMAR-21	3	-26.997	-71.03	28.1345	0.173465	0.114255
CIMAR-21	3	-26.997	-71.03	28.1855	0.163605	0.114093
CIMAR-21	3	-26.997	-71.03	28.2203	0.163615	0.113982
CIMAR-21	3	-26.997	-71.03	28.2473	0.164689	0.113896
CIMAR-21	3	-26.997	-71.03	28.2801	0.165973	0.113789
CIMAR-21	3	-26.997	-71.03	28.3302	0.167937	0.113625
CIMAR-21	3	-26.997	-71.03	28.3649	0.167923	0.113511
CIMAR-21	3	-26.997	-71.03	28.3792	0.1704	0.113464
CIMAR-21	3	-26.997	-71.03	28.4299	0.179176	0.113368
CIMAR-21	3	-26.997	-71.03	28.4646	0.179162	0.113302
CIMAR-21	3	-26.997	-71.03	28.4913	0.178481	0.113251
CIMAR-21	3	-26.997	-71.03	28.5248	0.177661	0.113192
CIMAR-21	3	-26.997	-71.03	28.5757	0.176419	0.113103
CIMAR-21	3	-26.997	-71.03	28.6113	0.176445	0.11304
CIMAR-21	3	-26.997	-71.03	28.626	0.175675	0.113014
CIMAR-21	3	-26.997	-71.03	28.6773	0.172965	0.113195
CIMAR-21	3	-26.997	-71.03	28.7125	0.17299	0.113319
CIMAR-21	3	-26.997	-71.03	28.74	0.173292	0.113416
CIMAR-21	3	-26.997	-71.03	28.7743	0.173622	0.11353
CIMAR-21	3	-26.997	-71.03	28.8242	0.174103	0.113697	15.724	34.842	238.63
CIMAR-21	3	-26.997	-71.03	28.8591	0.174082	0.113813
CIMAR-21	3	-26.997	-71.03	28.8732	0.174126	0.11386
CIMAR-21	3	-26.997	-71.03	28.9236	0.174282	0.113738
CIMAR-21	3	-26.997	-71.03	28.9582	0.174261	0.113655
CIMAR-21	3	-26.997	-71.03	28.9852	0.173242	0.113589
CIMAR-21	3	-26.997	-71.03	29.0181	0.172025	0.113513
CIMAR-21	3	-26.997	-71.03	29.0688	0.170149	0.113397
CIMAR-21	3	-26.997	-71.03	29.1033	0.170155	0.113317
CIMAR-21	3	-26.997	-71.03	29.1175	0.170563	0.113284
CIMAR-21	3	-26.997	-71.03	29.1688	0.172022	0.113729
CIMAR-21	3	-26.997	-71.03	29.2033	0.172029	0.114028
CIMAR-21	3	-26.997	-71.03	29.2297	0.172684	0.114258
CIMAR-21	3	-26.997	-71.03	29.2625	0.173487	0.114542
CIMAR-21	3	-26.997	-71.03	29.3128	0.174724	0.114979
CIMAR-21	3	-26.997	-71.03	29.3482	0.174726	0.115285
CIMAR-21	3	-26.997	-71.03	29.3627	0.173653	0.115411
CIMAR-21	3	-26.997	-71.03	29.4129	0.169942	0.115165
CIMAR-21	3	-26.997	-71.03	29.4473	0.169944	0.114997
CIMAR-21	3	-26.997	-71.03	29.4751	0.169364	0.114861
CIMAR-21	3	-26.997	-71.03	29.5084	0.168657	0.114695
CIMAR-21	3	-26.997	-71.03	29.5581	0.167605	0.114449
CIMAR-21	3	-26.997	-71.03	29.5928	0.167597	0.114276
CIMAR-21	3	-26.997	-71.03	29.6073	0.16911	0.114205
CIMAR-21	3	-26.997	-71.03	29.657	0.17431	0.114148
CIMAR-21	3	-26.997	-71.03	29.6907	0.174302	0.114109
CIMAR-21	3	-26.997	-71.03	29.7191	0.172864	0.114077
CIMAR-21	3	-26.997	-71.03	29.7533	0.171129	0.114038
CIMAR-21	3	-26.997	-71.03	29.8028	0.168626	0.113981
CIMAR-21	3	-26.997	-71.03	29.8373	0.168623	0.113942	15.713	34.84	238.413	7.196	1.11
CIMAR-21	3	-26.997	-71.03	29.8514	0.169606	0.113926
CIMAR-21	3	-26.997	-71.03	29.9014	0.173084	0.113899
CIMAR-21	3	-26.997	-71.03	29.9359	0.173081	0.113881
CIMAR-21	3	-26.997	-71.03	29.9632	0.173538	0.113867
CIMAR-21	3	-26.997	-71.03	29.9972	0.17411	0.11385
CIMAR-21	3	-26.997	-71.03	30.0475	0.174958	0.113824
CIMAR-21	3	-26.997	-71.03	30.0821	0.174958	0.113807
CIMAR-21	3	-26.997	-71.03	30.0962	0.174948	0.1138
CIMAR-21	3	-26.997	-71.03	30.1463	0.174913	0.113787
CIMAR-21	3	-26.997	-71.03	30.1807	0.174912	0.113779
CIMAR-21	3	-26.997	-71.03	30.2087	0.173342	0.113772
CIMAR-21	3	-26.997	-71.03	30.2425	0.171448	0.113764
CIMAR-21	3	-26.997	-71.03	30.2927	0.16863	0.113752
CIMAR-21	3	-26.997	-71.03	30.3269	0.168626	0.113744
CIMAR-21	3	-26.997	-71.03	30.3412	0.170799	0.113741
CIMAR-21	3	-26.997	-71.03	30.3915	0.178477	0.113473
CIMAR-21	3	-26.997	-71.03	30.4257	0.178473	0.113291
CIMAR-21	3	-26.997	-71.03	30.454	0.176079	0.11314
CIMAR-21	3	-26.997	-71.03	30.4882	0.173191	0.112958
CIMAR-21	3	-26.997	-71.03	30.5377	0.169028	0.112694
CIMAR-21	3	-26.997	-71.03	30.5726	0.169034	0.112508
CIMAR-21	3	-26.997	-71.03	30.5869	0.172193	0.112431
CIMAR-21	3	-26.997	-71.03	30.6373	0.183262	0.112884
CIMAR-21	3	-26.997	-71.03	30.6718	0.183268	0.113194
CIMAR-21	3	-26.997	-71.03	30.6994	0.179274	0.113442
CIMAR-21	3	-26.997	-71.03	30.7332	0.174383	0.113747
CIMAR-21	3	-26.997	-71.03	30.783	0.167172	0.114196
CIMAR-21	3	-26.997	-71.03	30.8186	0.167178	0.114518
CIMAR-21	3	-26.997	-71.03	30.833	0.168742	0.114648	15.696	34.839	239.245
CIMAR-21	3	-26.997	-71.03	30.8833	0.174221	0.114333
CIMAR-21	3	-26.997	-71.03	30.9175	0.174228	0.11412
CIMAR-21	3	-26.997	-71.03	30.9454	0.175351	0.113944
CIMAR-21	3	-26.997	-71.03	30.9791	0.176697	0.113733
CIMAR-21	3	-26.997	-71.03	31.0327	0.178833	0.113397
CIMAR-21	3	-26.997	-71.03	31.0671	0.178833	0.113181
CIMAR-21	3	-26.997	-71.03	31.081	0.177864	0.113094
CIMAR-21	3	-26.997	-71.03	31.1331	0.174249	0.113112
CIMAR-21	3	-26.997	-71.03	31.1679	0.174248	0.113125
CIMAR-21	3	-26.997	-71.03	31.1956	0.174368	0.113135
CIMAR-21	3	-26.997	-71.03	31.2301	0.174516	0.113146
CIMAR-21	3	-26.997	-71.03	31.2813	0.174735	0.113163
CIMAR-21	3	-26.997	-71.03	31.3172	0.174734	0.113175
CIMAR-21	3	-26.997	-71.03	31.3314	0.174972	0.11318
CIMAR-21	3	-26.997	-71.03	31.382	0.175822	0.113269
CIMAR-21	3	-26.997	-71.03	31.4168	0.175821	0.11333
CIMAR-21	3	-26.997	-71.03	31.4444	0.174885	0.113378
CIMAR-21	3	-26.997	-71.03	31.4786	0.17373	0.113438
CIMAR-21	3	-26.997	-71.03	31.5283	0.172045	0.113526
CIMAR-21	3	-26.997	-71.03	31.5635	0.172045	0.113588
CIMAR-21	3	-26.997	-71.03	31.5776	0.173626	0.113613
CIMAR-21	3	-26.997	-71.03	31.6303	0.179526	0.113319
CIMAR-21	3	-26.997	-71.03	31.6645	0.179526	0.113128
CIMAR-21	3	-26.997	-71.03	31.6919	0.179069	0.112975
CIMAR-21	3	-26.997	-71.03	31.7253	0.17851	0.112787
CIMAR-21	3	-26.997	-71.03	31.7757	0.177667	0.112504
CIMAR-21	3	-26.997	-71.03	31.8106	0.177664	0.112308
CIMAR-21	3	-26.997	-71.03	31.8247	0.177442	0.112229	15.683	34.837	240.023
CIMAR-21	3	-26.997	-71.03	31.8747	0.176652	0.112242
CIMAR-21	3	-26.997	-71.03	31.9094	0.17665	0.112251
CIMAR-21	3	-26.997	-71.03	31.9357	0.177244	0.112258
CIMAR-21	3	-26.997	-71.03	31.9689	0.178001	0.112269
CIMAR-21	3	-26.997	-71.03	32.02	0.179163	0.112285
CIMAR-21	3	-26.997	-71.03	32.0557	0.179166	0.112296
CIMAR-21	3	-26.997	-71.03	32.0701	0.180671	0.1123
CIMAR-21	3	-26.997	-71.03	32.1203	0.185922	0.11222
CIMAR-21	3	-26.997	-71.03	32.1548	0.185925	0.112165
CIMAR-21	3	-26.997	-71.03	32.1827	0.18559	0.112121
CIMAR-21	3	-26.997	-71.03	32.2162	0.18518	0.112066
CIMAR-21	3	-26.997	-71.03	32.2663	0.184563	0.111984
CIMAR-21	3	-26.997	-71.03	32.3021	0.184557	0.111926
CIMAR-21	3	-26.997	-71.03	32.3166	0.183588	0.111902
CIMAR-21	3	-26.997	-71.03	32.3669	0.18024	0.112104
CIMAR-21	3	-26.997	-71.03	32.4008	0.180235	0.11224
CIMAR-21	3	-26.997	-71.03	32.428	0.179563	0.112349
CIMAR-21	3	-26.997	-71.03	32.4619	0.178735	0.112486
CIMAR-21	3	-26.997	-71.03	32.5127	0.177491	0.112691
CIMAR-21	3	-26.997	-71.03	32.5483	0.17749	0.112835
CIMAR-21	3	-26.997	-71.03	32.5626	0.178949	0.112893
CIMAR-21	3	-26.997	-71.03	32.6137	0.184182	0.112801
CIMAR-21	3	-26.997	-71.03	32.6482	0.184181	0.112739
CIMAR-21	3	-26.997	-71.03	32.6754	0.182502	0.11269
CIMAR-21	3	-26.997	-71.03	32.7092	0.18042	0.11263
CIMAR-21	3	-26.997	-71.03	32.76	0.177278	0.112539
CIMAR-21	3	-26.997	-71.03	32.7949	0.177277	0.112477
CIMAR-21	3	-26.997	-71.03	32.8089	0.177067	0.112452	15.671	34.836	239.973
CIMAR-21	3	-26.997	-71.03	32.8595	0.176307	0.112524
CIMAR-21	3	-26.997	-71.03	32.8936	0.176306	0.112573
CIMAR-21	3	-26.997	-71.03	32.9211	0.178095	0.112613
CIMAR-21	3	-26.997	-71.03	32.9546	0.180279	0.112662
CIMAR-21	3	-26.997	-71.03	33.0054	0.183595	0.112737
CIMAR-21	3	-26.997	-71.03	33.0402	0.18361	0.112789
CIMAR-21	3	-26.997	-71.03	33.0541	0.185494	0.112809
CIMAR-21	3	-26.997	-71.03	33.1048	0.192397	0.112682
CIMAR-21	3	-26.997	-71.03	33.1394	0.192412	0.112595
CIMAR-21	3	-26.997	-71.03	33.1664	0.189816	0.112527
CIMAR-21	3	-26.997	-71.03	33.1996	0.1866	0.112441
CIMAR-21	3	-26.997	-71.03	33.2507	0.181656	0.112309
CIMAR-21	3	-26.997	-71.03	33.2851	0.181648	0.112219
CIMAR-21	3	-26.997	-71.03	33.2991	0.181697	0.112183
CIMAR-21	3	-26.997	-71.03	33.3501	0.181876	0.111963
CIMAR-21	3	-26.997	-71.03	33.3854	0.181867	0.111811
CIMAR-21	3	-26.997	-71.03	33.4131	0.182085	0.111691
CIMAR-21	3	-26.997	-71.03	33.4467	0.182352	0.111547
CIMAR-21	3	-26.997	-71.03	33.4979	0.182759	0.111327
CIMAR-21	3	-26.997	-71.03	33.5334	0.182754	0.111175
CIMAR-21	3	-26.997	-71.03	33.5475	0.182615	0.111114
CIMAR-21	3	-26.997	-71.03	33.5983	0.182117	0.11128
CIMAR-21	3	-26.997	-71.03	33.6334	0.182111	0.111395
CIMAR-21	3	-26.997	-71.03	33.6604	0.180854	0.111483
CIMAR-21	3	-26.997	-71.03	33.6943	0.179291	0.111595
CIMAR-21	3	-26.997	-71.03	33.7442	0.176997	0.111759
CIMAR-21	3	-26.997	-71.03	33.7786	0.177008	0.111873
CIMAR-21	3	-26.997	-71.03	33.7927	0.17883	0.111919
CIMAR-21	3	-26.997	-71.03	33.8429	0.185377	0.11227	15.657	34.834	238.741	7.258	1.111
CIMAR-21	3	-26.997	-71.03	33.877	0.185387	0.112509
CIMAR-21	3	-26.997	-71.03	33.9039	0.184017	0.112697
CIMAR-21	3	-26.997	-71.03	33.9377	0.182286	0.112934
CIMAR-21	3	-26.997	-71.03	33.9904	0.179582	0.113303
CIMAR-21	3	-26.997	-71.03	34.0252	0.179582	0.113546
CIMAR-21	3	-26.997	-71.03	34.0394	0.180615	0.113646
CIMAR-21	3	-26.997	-71.03	34.0897	0.184255	0.113998
CIMAR-21	3	-26.997	-71.03	34.1237	0.184255	0.114236
CIMAR-21	3	-26.997	-71.03	34.1508	0.182413	0.114426
CIMAR-21	3	-26.997	-71.03	34.1848	0.180093	0.114661
CIMAR-21	3	-26.997	-71.03	34.2346	0.176689	0.115006
CIMAR-21	3	-26.997	-71.03	34.2694	0.176679	0.115247
CIMAR-21	3	-26.997	-71.03	34.2834	0.178262	0.115344
CIMAR-21	3	-26.997	-71.03	34.334	0.183993	0.115697
CIMAR-21	3	-26.997	-71.03	34.3682	0.183984	0.115935
CIMAR-21	3	-26.997	-71.03	34.3954	0.185194	0.116125
CIMAR-21	3	-26.997	-71.03	34.4289	0.186709	0.116362
CIMAR-21	3	-26.997	-71.03	34.4783	0.188941	0.116712
CIMAR-21	3	-26.997	-71.03	34.513	0.188956	0.116958
CIMAR-21	3	-26.997	-71.03	34.527	0.187845	0.117058
CIMAR-21	3	-26.997	-71.03	34.5791	0.183755	0.116959
CIMAR-21	3	-26.997	-71.03	34.6132	0.18377	0.116894
CIMAR-21	3	-26.997	-71.03	34.6406	0.183657	0.116842
CIMAR-21	3	-26.997	-71.03	34.6745	0.183488	0.116773
CIMAR-21	3	-26.997	-71.03	34.7242	0.183239	0.116671
CIMAR-21	3	-26.997	-71.03	34.7587	0.183225	0.1166
CIMAR-21	3	-26.997	-71.03	34.7731	0.183083	0.116571
CIMAR-21	3	-26.997	-71.03	34.8234	0.182585	0.116481
CIMAR-21	3	-26.997	-71.03	34.8576	0.182571	0.11642	15.62	34.832	237.4
CIMAR-21	3	-26.997	-71.03	34.8845	0.181592	0.116372
CIMAR-21	3	-26.997	-71.03	34.918	0.180407	0.116316
CIMAR-21	3	-26.997	-71.03	34.9675	0.178647	0.116234
CIMAR-21	3	-26.997	-71.03	35.0022	0.178662	0.116177
CIMAR-21	3	-26.997	-71.03	35.0164	0.179106	0.116154
CIMAR-21	3	-26.997	-71.03	35.0667	0.180671	0.116258
CIMAR-21	3	-26.997	-71.03	35.1006	0.180686	0.116329
CIMAR-21	3	-26.997	-71.03	35.1277	0.180984	0.116385
CIMAR-21	3	-26.997	-71.03	35.1605	0.181332	0.116452
CIMAR-21	3	-26.997	-71.03	35.2096	0.18185	0.116552
CIMAR-21	3	-26.997	-71.03	35.2437	0.181848	0.116621
CIMAR-21	3	-26.997	-71.03	35.2584	0.183335	0.116651
CIMAR-21	3	-26.997	-71.03	35.3083	0.188419	0.116365
CIMAR-21	3	-26.997	-71.03	35.3424	0.188417	0.11617
CIMAR-21	3	-26.997	-71.03	35.3701	0.187398	0.116011
CIMAR-21	3	-26.997	-71.03	35.4038	0.186158	0.115819
CIMAR-21	3	-26.997	-71.03	35.4547	0.184286	0.115527
CIMAR-21	3	-26.997	-71.03	35.489	0.184286	0.115331
CIMAR-21	3	-26.997	-71.03	35.503	0.183818	0.11525
CIMAR-21	3	-26.997	-71.03	35.5534	0.182144	0.115487
CIMAR-21	3	-26.997	-71.03	35.5871	0.182143	0.115646
CIMAR-21	3	-26.997	-71.03	35.614	0.181577	0.115773
CIMAR-21	3	-26.997	-71.03	35.6476	0.180879	0.115933
CIMAR-21	3	-26.997	-71.03	35.698	0.179836	0.116173
CIMAR-21	3	-26.997	-71.03	35.7335	0.179847	0.116342
CIMAR-21	3	-26.997	-71.03	35.7476	0.179662	0.11641
CIMAR-21	3	-26.997	-71.03	35.7987	0.178994	0.116186
CIMAR-21	3	-26.997	-71.03	35.8332	0.179005	0.116036	15.558	34.826	234.393
CIMAR-21	3	-26.997	-71.03	35.8613	0.178523	0.115913
CIMAR-21	3	-26.997	-71.03	35.8959	0.177917	0.115759
CIMAR-21	3	-26.997	-71.03	35.9467	0.177028	0.115534
CIMAR-21	3	-26.997	-71.03	35.982	0.177028	0.115377
CIMAR-21	3	-26.997	-71.03	35.9964	0.177889	0.115313
CIMAR-21	3	-26.997	-71.03	36.0467	0.18089	0.115416
CIMAR-21	3	-26.997	-71.03	36.0812	0.18089	0.115486
CIMAR-21	3	-26.997	-71.03	36.1084	0.180772	0.115541
CIMAR-21	3	-26.997	-71.03	36.1427	0.180615	0.11561
CIMAR-21	3	-26.997	-71.03	36.1926	0.180387	0.11571
CIMAR-21	3	-26.997	-71.03	36.2278	0.18038	0.11578
CIMAR-21	3	-26.997	-71.03	36.2421	0.179421	0.115809
CIMAR-21	3	-26.997	-71.03	36.2927	0.176023	0.115584
CIMAR-21	3	-26.997	-71.03	36.3274	0.176016	0.115431
CIMAR-21	3	-26.997	-71.03	36.3548	0.178914	0.115309
CIMAR-21	3	-26.997	-71.03	36.3883	0.182478	0.115164
CIMAR-21	3	-26.997	-71.03	36.4388	0.187856	0.114946
CIMAR-21	3	-26.997	-71.03	36.4733	0.187869	0.114797
CIMAR-21	3	-26.997	-71.03	36.4873	0.186296	0.114736
CIMAR-21	3	-26.997	-71.03	36.5373	0.180709	0.114896
CIMAR-21	3	-26.997	-71.03	36.5723	0.180722	0.115007
CIMAR-21	3	-26.997	-71.03	36.6	0.184022	0.115096
CIMAR-21	3	-26.997	-71.03	36.6339	0.188027	0.115201
CIMAR-21	3	-26.997	-71.03	36.6843	0.194006	0.115358
CIMAR-21	3	-26.997	-71.03	36.7197	0.194	0.115468
CIMAR-21	3	-26.997	-71.03	36.734	0.190912	0.115513
CIMAR-21	3	-26.997	-71.03	36.7847	0.179923	0.115334
CIMAR-21	3	-26.997	-71.03	36.8196	0.179917	0.115211
CIMAR-21	3	-26.997	-71.03	36.8466	0.181077	0.115116	15.532	34.824	232.648
CIMAR-21	3	-26.997	-71.03	36.8796	0.182488	0.114999
CIMAR-21	3	-26.997	-71.03	36.9319	0.184728	0.114813
CIMAR-21	3	-26.997	-71.03	36.9667	0.184718	0.11469
CIMAR-21	3	-26.997	-71.03	36.9806	0.18406	0.11464
CIMAR-21	3	-26.997	-71.03	37.0309	0.181675	0.114639
CIMAR-21	3	-26.997	-71.03	37.0654	0.181664	0.114639
CIMAR-21	3	-26.997	-71.03	37.093	0.180578	0.114639
CIMAR-21	3	-26.997	-71.03	37.1262	0.179277	0.114639
CIMAR-21	3	-26.997	-71.03	37.1797	0.177187	0.114639
CIMAR-21	3	-26.997	-71.03	37.2146	0.17719	0.114639
CIMAR-21	3	-26.997	-71.03	37.2289	0.179231	0.114639
CIMAR-21	3	-26.997	-71.03	37.2801	0.186534	0.114405
CIMAR-21	3	-26.997	-71.03	37.3151	0.186536	0.114244
CIMAR-21	3	-26.997	-71.03	37.343	0.184205	0.114117
CIMAR-21	3	-26.997	-71.03	37.3766	0.181389	0.113965
CIMAR-21	3	-26.997	-71.03	37.4281	0.177085	0.113733
CIMAR-21	3	-26.997	-71.03	37.4634	0.177092	0.113574
CIMAR-21	3	-26.997	-71.03	37.4778	0.177327	0.113508
CIMAR-21	3	-26.997	-71.03	37.5286	0.178155	0.113758
CIMAR-21	3	-26.997	-71.03	37.5633	0.178163	0.113928
CIMAR-21	3	-26.997	-71.03	37.5903	0.17949	0.11406
CIMAR-21	3	-26.997	-71.03	37.6237	0.181127	0.114222
CIMAR-21	3	-26.997	-71.03	37.6738	0.183578	0.114465
CIMAR-21	3	-26.997	-71.03	37.708	0.183573	0.114632
CIMAR-21	3	-26.997	-71.03	37.7224	0.181851	0.114701
CIMAR-21	3	-26.997	-71.03	37.7723	0.175865	0.114623
CIMAR-21	3	-26.997	-71.03	37.8065	0.17586	0.114569	15.497	34.82	230.085
CIMAR-21	3	-26.997	-71.03	37.8338	0.176844	0.114526
CIMAR-21	3	-26.997	-71.03	37.8667	0.178039	0.114474
CIMAR-21	3	-26.997	-71.03	37.9172	0.17987	0.114395
CIMAR-21	3	-26.997	-71.03	37.9525	0.179877	0.11434
CIMAR-21	3	-26.997	-71.03	37.9663	0.179252	0.114319
CIMAR-21	3	-26.997	-71.03	38.0178	0.176923	0.114172
CIMAR-21	3	-26.997	-71.03	38.0535	0.17693	0.11407
CIMAR-21	3	-26.997	-71.03	38.0814	0.177161	0.11399
CIMAR-21	3	-26.997	-71.03	38.1156	0.177433	0.113892
CIMAR-21	3	-26.997	-71.03	38.1665	0.177836	0.113747
CIMAR-21	3	-26.997	-71.03	38.2009	0.17783	0.113648
CIMAR-21	3	-26.997	-71.03	38.2148	0.177981	0.113609
CIMAR-21	3	-26.997	-71.03	38.2648	0.178524	0.113532
CIMAR-21	3	-26.997	-71.03	38.2994	0.178517	0.113479
CIMAR-21	3	-26.997	-71.03	38.3262	0.179339	0.113437
CIMAR-21	3	-26.997	-71.03	38.3589	0.180348	0.113387
CIMAR-21	3	-26.997	-71.03	38.4101	0.181922	0.113309
CIMAR-21	3	-26.997	-71.03	38.4454	0.181922	0.113254
CIMAR-21	3	-26.997	-71.03	38.4595	0.180618	0.113233
CIMAR-21	3	-26.997	-71.03	38.51	0.175904	0.112802
CIMAR-21	3	-26.997	-71.03	38.5442	0.175904	0.11251
CIMAR-21	3	-26.997	-71.03	38.5716	0.175816	0.112277
CIMAR-21	3	-26.997	-71.03	38.6048	0.175704	0.111994
CIMAR-21	3	-26.997	-71.03	38.655	0.175537	0.111566
CIMAR-21	3	-26.997	-71.03	38.6896	0.175534	0.111271
CIMAR-21	3	-26.997	-71.03	38.7038	0.175731	0.11115
CIMAR-21	3	-26.997	-71.03	38.7538	0.176424	0.111236
CIMAR-21	3	-26.997	-71.03	38.7884	0.176421	0.111295
CIMAR-21	3	-26.997	-71.03	38.8149	0.177412	0.111341
CIMAR-21	3	-26.997	-71.03	38.8479	0.178645	0.111398	15.457	34.814	228.419	7.154	1.107
CIMAR-21	3	-26.997	-71.03	38.8978	0.180508	0.111484
CIMAR-21	3	-26.997	-71.03	38.9329	0.180507	0.111544
CIMAR-21	3	-26.997	-71.03	38.9471	0.179906	0.111568
CIMAR-21	3	-26.997	-71.03	38.9971	0.17779	0.111615
CIMAR-21	3	-26.997	-71.03	39.0314	0.177789	0.111646
CIMAR-21	3	-26.997	-71.03	39.0581	0.178295	0.111671
CIMAR-21	3	-26.997	-71.03	39.0909	0.178921	0.111702
CIMAR-21	3	-26.997	-71.03	39.1411	0.17988	0.111749
CIMAR-21	3	-26.997	-71.03	39.1758	0.179885	0.111781
CIMAR-21	3	-26.997	-71.03	39.1902	0.178874	0.111795
CIMAR-21	3	-26.997	-71.03	39.2402	0.17538	0.111593
CIMAR-21	3	-26.997	-71.03	39.2744	0.175384	0.111454
CIMAR-21	3	-26.997	-71.03	39.3015	0.175186	0.111344
CIMAR-21	3	-26.997	-71.03	39.3345	0.174945	0.11121
CIMAR-21	3	-26.997	-71.03	39.3858	0.174569	0.111001
CIMAR-21	3	-26.997	-71.03	39.4209	0.174571	0.110859
CIMAR-21	3	-26.997	-71.03	39.4347	0.175687	0.110802
CIMAR-21	3	-26.997	-71.03	39.4853	0.179736	0.110719
CIMAR-21	3	-26.997	-71.03	39.5199	0.179738	0.110662
CIMAR-21	3	-26.997	-71.03	39.5475	0.177282	0.110617
CIMAR-21	3	-26.997	-71.03	39.5812	0.17428	0.110562
CIMAR-21	3	-26.997	-71.03	39.6319	0.169769	0.110479
CIMAR-21	3	-26.997	-71.03	39.6667	0.16977	0.110422
CIMAR-21	3	-26.997	-71.03	39.6809	0.170269	0.110399
CIMAR-21	3	-26.997	-71.03	39.7308	0.172023	0.110378
CIMAR-21	3	-26.997	-71.03	39.7649	0.172024	0.110364
CIMAR-21	3	-26.997	-71.03	39.7926	0.173712	0.110352
CIMAR-21	3	-26.997	-71.03	39.8261	0.175752	0.110337
CIMAR-21	3	-26.997	-71.03	39.8774	0.178876	0.110313	15.366	34.8	224.111
CIMAR-21	3	-26.997	-71.03	39.9126	0.178871	0.110297
CIMAR-21	3	-26.997	-71.03	39.9271	0.178575	0.110291
CIMAR-21	3	-26.997	-71.03	39.9771	0.177549	0.109991
CIMAR-21	3	-26.997	-71.03	40.0108	0.177544	0.109789
CIMAR-21	3	-26.997	-71.03	40.0376	0.177733	0.109628
CIMAR-21	3	-26.997	-71.03	40.0699	0.177965	0.109435
CIMAR-21	3	-26.997	-71.03	40.1212	0.178333	0.10913
CIMAR-21	3	-26.997	-71.03	40.1559	0.178332	0.108922
CIMAR-21	3	-26.997	-71.03	40.1702	0.178464	0.108838
CIMAR-21	3	-26.997	-71.03	40.2207	0.178933	0.109404
CIMAR-21	3	-26.997	-71.03	40.2554	0.178932	0.109792
CIMAR-21	3	-26.997	-71.03	40.2821	0.178571	0.110092
CIMAR-21	3	-26.997	-71.03	40.3161	0.178131	0.110475
CIMAR-21	3	-26.997	-71.03	40.3668	0.177474	0.111047
CIMAR-21	3	-26.997	-71.03	40.4014	0.177492	0.111437
CIMAR-21	3	-26.997	-71.03	40.4158	0.175343	0.111598
CIMAR-21	3	-26.997	-71.03	40.467	0.167647	0.111137
CIMAR-21	3	-26.997	-71.03	40.502	0.167665	0.110822
CIMAR-21	3	-26.997	-71.03	40.5292	0.169751	0.110576
CIMAR-21	3	-26.997	-71.03	40.5632	0.17233	0.110267
CIMAR-21	3	-26.997	-71.03	40.6136	0.176154	0.109807
CIMAR-21	3	-26.997	-71.03	40.648	0.176147	0.109493
CIMAR-21	3	-26.997	-71.03	40.662	0.175419	0.109366
CIMAR-21	3	-26.997	-71.03	40.7126	0.172793	0.109427
CIMAR-21	3	-26.997	-71.03	40.748	0.172786	0.10947
CIMAR-21	3	-26.997	-71.03	40.7752	0.174634	0.109503
CIMAR-21	3	-26.997	-71.03	40.8089	0.176929	0.109542
CIMAR-21	3	-26.997	-71.03	40.8595	0.180364	0.109602	15.298	34.795	220.063
CIMAR-21	3	-26.997	-71.03	40.8943	0.180351	0.109643
CIMAR-21	3	-26.997	-71.03	40.9088	0.180478	0.10966
CIMAR-21	3	-26.997	-71.03	40.9596	0.180921	0.1095
CIMAR-21	3	-26.997	-71.03	40.9947	0.180908	0.10939
CIMAR-21	3	-26.997	-71.03	41.0223	0.180312	0.109303
CIMAR-21	3	-26.997	-71.03	41.0559	0.179602	0.109199
CIMAR-21	3	-26.997	-71.03	41.1059	0.178544	0.109044
CIMAR-21	3	-26.997	-71.03	41.1417	0.178545	0.108934
CIMAR-21	3	-26.997	-71.03	41.1558	0.177427	0.10889
CIMAR-21	3	-26.997	-71.03	41.2069	0.173387	0.108854
CIMAR-21	3	-26.997	-71.03	41.2416	0.173388	0.10883
CIMAR-21	3	-26.997	-71.03	41.2689	0.174461	0.108812
CIMAR-21	3	-26.997	-71.03	41.3022	0.175781	0.10879
CIMAR-21	3	-26.997	-71.03	41.353	0.177797	0.108758
CIMAR-21	3	-26.997	-71.03	41.3878	0.177809	0.108736
CIMAR-21	3	-26.997	-71.03	41.4017	0.176919	0.108727
CIMAR-21	3	-26.997	-71.03	41.4515	0.173747	0.108858
CIMAR-21	3	-26.997	-71.03	41.4856	0.173759	0.108948
CIMAR-21	3	-26.997	-71.03	41.5128	0.175071	0.10902
CIMAR-21	3	-26.997	-71.03	41.5462	0.176668	0.109105
CIMAR-21	3	-26.997	-71.03	41.5967	0.179078	0.109234
CIMAR-21	3	-26.997	-71.03	41.6317	0.179072	0.109323
CIMAR-21	3	-26.997	-71.03	41.6455	0.178396	0.109358
CIMAR-21	3	-26.997	-71.03	41.6963	0.175919	0.10935
CIMAR-21	3	-26.997	-71.03	41.7312	0.175914	0.109344
CIMAR-21	3	-26.997	-71.03	41.7589	0.176558	0.10934
CIMAR-21	3	-26.997	-71.03	41.7929	0.177352	0.109335
CIMAR-21	3	-26.997	-71.03	41.8423	0.178505	0.109328	15.202	34.796	212.436
CIMAR-21	3	-26.997	-71.03	41.8772	0.178503	0.109323
CIMAR-21	3	-26.997	-71.03	41.891	0.178656	0.109321
CIMAR-21	3	-26.997	-71.03	41.9417	0.179214	0.10924
CIMAR-21	3	-26.997	-71.03	41.9767	0.179212	0.109184
CIMAR-21	3	-26.997	-71.03	42.0044	0.178788	0.109139
CIMAR-21	3	-26.997	-71.03	42.0381	0.178271	0.109085
CIMAR-21	3	-26.997	-71.03	42.0886	0.177495	0.109004
CIMAR-21	3	-26.997	-71.03	42.1237	0.177492	0.108948
CIMAR-21	3	-26.997	-71.03	42.1378	0.178086	0.108925
CIMAR-21	3	-26.997	-71.03	42.1881	0.180211	0.108708
CIMAR-21	3	-26.997	-71.03	42.2219	0.180207	0.108561
CIMAR-21	3	-26.997	-71.03	42.2495	0.178691	0.108442
CIMAR-21	3	-26.997	-71.03	42.2829	0.176863	0.108299
CIMAR-21	3	-26.997	-71.03	42.3338	0.174079	0.108082
CIMAR-21	3	-26.997	-71.03	42.3682	0.17408	0.107934
CIMAR-21	3	-26.997	-71.03	42.3824	0.174937	0.107873
CIMAR-21	3	-26.997	-71.03	42.4326	0.177961	0.10795
CIMAR-21	3	-26.997	-71.03	42.4672	0.177963	0.108003
CIMAR-21	3	-26.997	-71.03	42.4938	0.177408	0.108044
CIMAR-21	3	-26.997	-71.03	42.5272	0.1767	0.108094
CIMAR-21	3	-26.997	-71.03	42.578	0.175628	0.108169
CIMAR-21	3	-26.997	-71.03	42.6129	0.175619	0.108221
CIMAR-21	3	-26.997	-71.03	42.6272	0.173426	0.108242
CIMAR-21	3	-26.997	-71.03	42.6774	0.16576	0.108485
CIMAR-21	3	-26.997	-71.03	42.7116	0.165751	0.108652
CIMAR-21	3	-26.997	-71.03	42.7397	0.169266	0.108788
CIMAR-21	3	-26.997	-71.03	42.7732	0.173485	0.108954
CIMAR-21	3	-26.997	-71.03	42.8229	0.17973	0.109199	15.152	34.788	211.546	7.066	1.104
CIMAR-21	3	-26.997	-71.03	42.8581	0.179746	0.109372
CIMAR-21	3	-26.997	-71.03	42.872	0.178437	0.109441
CIMAR-21	3	-26.997	-71.03	42.922	0.173738	0.109285
CIMAR-21	3	-26.997	-71.03	42.9562	0.173754	0.109179
CIMAR-21	3	-26.997	-71.03	42.9843	0.172511	0.109091
CIMAR-21	3	-26.997	-71.03	43.0181	0.171002	0.108985
CIMAR-21	3	-26.997	-71.03	43.0698	0.16869	0.108822
CIMAR-21	3	-26.997	-71.03	43.1058	0.168689	0.108709
CIMAR-21	3	-26.997	-71.03	43.1201	0.169061	0.108664
CIMAR-21	3	-26.997	-71.03	43.1706	0.170376	0.108483
CIMAR-21	3	-26.997	-71.03	43.2053	0.170376	0.108359
CIMAR-21	3	-26.997	-71.03	43.2332	0.17099	0.108259
CIMAR-21	3	-26.997	-71.03	43.2669	0.171731	0.108139
CIMAR-21	3	-26.997	-71.03	43.3169	0.172838	0.107959
CIMAR-21	3	-26.997	-71.03	43.3524	0.172841	0.107832
CIMAR-21	3	-26.997	-71.03	43.3666	0.173888	0.107781
CIMAR-21	3	-26.997	-71.03	43.4176	0.177631	0.108148
CIMAR-21	3	-26.997	-71.03	43.4525	0.177634	0.1084
CIMAR-21	3	-26.997	-71.03	43.4808	0.17642	0.108604
CIMAR-21	3	-26.997	-71.03	43.515	0.174941	0.108848
CIMAR-21	3	-26.997	-71.03	43.5651	0.172773	0.109206
CIMAR-21	3	-26.997	-71.03	43.5995	0.172767	0.109453
CIMAR-21	3	-26.997	-71.03	43.6135	0.173241	0.109552
CIMAR-21	3	-26.997	-71.03	43.666	0.17502	0.109496
CIMAR-21	3	-26.997	-71.03	43.7007	0.175015	0.109459
CIMAR-21	3	-26.997	-71.03	43.7287	0.173638	0.109429
CIMAR-21	3	-26.997	-71.03	43.7627	0.171964	0.109393
CIMAR-21	3	-26.997	-71.03	43.8136	0.169468	0.109341
CIMAR-21	3	-26.997	-71.03	43.8483	0.169466	0.109305	15.137	34.786	210.91
CIMAR-21	3	-26.997	-71.03	43.8625	0.172405	0.10929
CIMAR-21	3	-26.997	-71.03	43.9132	0.182864	0.109379
CIMAR-21	3	-26.997	-71.03	43.9479	0.182862	0.10944
CIMAR-21	3	-26.997	-71.03	43.9754	0.180803	0.109489
CIMAR-21	3	-26.997	-71.03	44.0086	0.178343	0.10955
CIMAR-21	3	-26.997	-71.03	44.0603	0.174519	0.109646
CIMAR-21	3	-26.997	-71.03	44.0951	0.17454	0.10971
CIMAR-21	3	-26.997	-71.03	44.109	0.17564	0.109736
CIMAR-21	3	-26.997	-71.03	44.1594	0.179605	0.109673
CIMAR-21	3	-26.997	-71.03	44.1939	0.179626	0.109629
CIMAR-21	3	-26.997	-71.03	44.2219	0.178537	0.109594
CIMAR-21	3	-26.997	-71.03	44.2558	0.177186	0.109547
CIMAR-21	3	-26.997	-71.03	44.3066	0.175161	0.109476
CIMAR-21	3	-26.997	-71.03	44.3417	0.175147	0.109427
CIMAR-21	3	-26.997	-71.03	44.3558	0.175994	0.109408
CIMAR-21	3	-26.997	-71.03	44.4059	0.179023	0.109345
CIMAR-21	3	-26.997	-71.03	44.4402	0.17901	0.109302
CIMAR-21	3	-26.997	-71.03	44.4675	0.181717	0.109268
CIMAR-21	3	-26.997	-71.03	44.5014	0.185095	0.109228
CIMAR-21	3	-26.997	-71.03	44.5515	0.190075	0.109169
CIMAR-21	3	-26.997	-71.03	44.5857	0.190078	0.109129
CIMAR-21	3	-26.997	-71.03	44.5999	0.18778	0.109112
CIMAR-21	3	-26.997	-71.03	44.6504	0.179577	0.10914
CIMAR-21	3	-26.997	-71.03	44.6846	0.17958	0.109159
CIMAR-21	3	-26.997	-71.03	44.7115	0.180537	0.109173
CIMAR-21	3	-26.997	-71.03	44.7452	0.181738	0.109192
CIMAR-21	3	-26.997	-71.03	44.7965	0.18357	0.109221
CIMAR-21	3	-26.997	-71.03	44.8326	0.183576	0.109241	15.127	34.785	210.413
CIMAR-21	3	-26.997	-71.03	44.8467	0.182204	0.109249
CIMAR-21	3	-26.997	-71.03	44.8974	0.177273	0.109457
CIMAR-21	3	-26.997	-71.03	44.9319	0.177279	0.109599
CIMAR-21	3	-26.997	-71.03	44.9593	0.178696	0.109711
CIMAR-21	3	-26.997	-71.03	44.9929	0.180435	0.109849
CIMAR-21	3	-26.997	-71.03	45.0425	0.182999	0.110053
CIMAR-21	3	-26.997	-71.03	45.0772	0.183008	0.110196
CIMAR-21	3	-26.997	-71.03	45.0916	0.183431	0.110255
CIMAR-21	3	-26.997	-71.03	45.1426	0.184941	0.109999
CIMAR-21	3	-26.997	-71.03	45.1771	0.184949	0.109826
CIMAR-21	3	-26.997	-71.03	45.2052	0.185	0.109685
CIMAR-21	3	-26.997	-71.03	45.2389	0.185036	0.109512
CIMAR-21	3	-26.997	-71.03	45.2903	0.18509	0.109249
CIMAR-21	3	-26.997	-71.03	45.3256	0.185073	0.109068
CIMAR-21	3	-26.997	-71.03	45.3399	0.185419	0.108995
CIMAR-21	3	-26.997	-71.03	45.3905	0.186641	0.109267
CIMAR-21	3	-26.997	-71.03	45.4254	0.186624	0.109454
CIMAR-21	3	-26.997	-71.03	45.4521	0.186147	0.109598
CIMAR-21	3	-26.997	-71.03	45.4856	0.185568	0.10978
CIMAR-21	3	-26.997	-71.03	45.5369	0.184681	0.11006
CIMAR-21	3	-26.997	-71.03	45.5725	0.184684	0.110254
CIMAR-21	3	-26.997	-71.03	45.5866	0.184194	0.110331
CIMAR-21	3	-26.997	-71.03	45.6365	0.18246	0.110251
CIMAR-21	3	-26.997	-71.03	45.6704	0.182462	0.110196
CIMAR-21	3	-26.997	-71.03	45.6977	0.184036	0.110152
CIMAR-21	3	-26.997	-71.03	45.7314	0.18598	0.110096
CIMAR-21	3	-26.997	-71.03	45.783	0.188949	0.110011
CIMAR-21	3	-26.997	-71.03	45.8188	0.188943	0.109951	15.1	34.78	209.436
CIMAR-21	3	-26.997	-71.03	45.8333	0.189273	0.109928
CIMAR-21	3	-26.997	-71.03	45.8832	0.19042	0.1099
CIMAR-21	3	-26.997	-71.03	45.9177	0.190414	0.109881
CIMAR-21	3	-26.997	-71.03	45.9453	0.193493	0.109865
CIMAR-21	3	-26.997	-71.03	45.9787	0.197223	0.10985
CIMAR-21	3	-26.997	-71.03	46.0297	0.202942	0.109826
CIMAR-21	3	-26.997	-71.03	46.0651	0.202958	0.10981
CIMAR-21	3	-26.997	-71.03	46.0793	0.201674	0.109803
CIMAR-21	3	-26.997	-71.03	46.1311	0.197008	0.109964
CIMAR-21	3	-26.997	-71.03	46.1664	0.197023	0.110074
CIMAR-21	3	-26.997	-71.03	46.1942	0.197449	0.11016
CIMAR-21	3	-26.997	-71.03	46.2285	0.197949	0.110264
CIMAR-21	3	-26.997	-71.03	46.28	0.198701	0.110419
CIMAR-21	3	-26.997	-71.03	46.3152	0.198693	0.110525
CIMAR-21	3	-26.997	-71.03	46.3295	0.197975	0.110568
CIMAR-21	3	-26.997	-71.03	46.3796	0.195462	0.110855
CIMAR-21	3	-26.997	-71.03	46.4141	0.195454	0.111053
CIMAR-21	3	-26.997	-71.03	46.4427	0.197474	0.111217
CIMAR-21	3	-26.997	-71.03	46.4771	0.199911	0.111414
CIMAR-21	3	-26.997	-71.03	46.528	0.203524	0.111707
CIMAR-21	3	-26.997	-71.03	46.5627	0.203524	0.111906
CIMAR-21	3	-26.997	-71.03	46.5766	0.203897	0.111986
CIMAR-21	3	-26.997	-71.03	46.6262	0.205227	0.111717
CIMAR-21	3	-26.997	-71.03	46.6603	0.205227	0.111533
CIMAR-21	3	-26.997	-71.03	46.688	0.205401	0.111382
CIMAR-21	3	-26.997	-71.03	46.7222	0.205627	0.1112
CIMAR-21	3	-26.997	-71.03	46.7729	0.205964	0.110928
CIMAR-21	3	-26.997	-71.03	46.8076	0.205975	0.110742
CIMAR-21	3	-26.997	-71.03	46.8219	0.207354	0.110665	15.031	34.767	208.616	6.882	1.104
CIMAR-21	3	-26.997	-71.03	46.8728	0.212261	0.111117
CIMAR-21	3	-26.997	-71.03	46.9074	0.212273	0.111424
CIMAR-21	3	-26.997	-71.03	46.9345	0.210949	0.111664
CIMAR-21	3	-26.997	-71.03	46.9676	0.209316	0.111956
CIMAR-21	3	-26.997	-71.03	47.0194	0.206765	0.112412
CIMAR-21	3	-26.997	-71.03	47.0554	0.206764	0.112729
CIMAR-21	3	-26.997	-71.03	47.0696	0.209186	0.112854
CIMAR-21	3	-26.997	-71.03	47.1206	0.217849	0.113367
CIMAR-21	3	-26.997	-71.03	47.1548	0.217848	0.113711
CIMAR-21	3	-26.997	-71.03	47.1831	0.218074	0.113994
CIMAR-21	3	-26.997	-71.03	47.2171	0.218352	0.114337
CIMAR-21	3	-26.997	-71.03	47.2666	0.218755	0.114836
CIMAR-21	3	-26.997	-71.03	47.3017	0.218759	0.115189
CIMAR-21	3	-26.997	-71.03	47.316	0.219286	0.115333
CIMAR-21	3	-26.997	-71.03	47.3665	0.221149	0.116038
CIMAR-21	3	-26.997	-71.03	47.4009	0.221153	0.116518
CIMAR-21	3	-26.997	-71.03	47.4288	0.222676	0.116907
CIMAR-21	3	-26.997	-71.03	47.4626	0.224548	0.117383
CIMAR-21	3	-26.997	-71.03	47.5142	0.227398	0.118108
CIMAR-21	3	-26.997	-71.03	47.5493	0.227424	0.118601
CIMAR-21	3	-26.997	-71.03	47.5633	0.227489	0.118799
CIMAR-21	3	-26.997	-71.03	47.6132	0.227722	0.118594
CIMAR-21	3	-26.997	-71.03	47.6473	0.227747	0.118455
CIMAR-21	3	-26.997	-71.03	47.6744	0.226902	0.118344
CIMAR-21	3	-26.997	-71.03	47.7079	0.22582	0.118201
CIMAR-21	3	-26.997	-71.03	47.7591	0.224167	0.117983
CIMAR-21	3	-26.997	-71.03	47.7945	0.224157	0.117832
CIMAR-21	3	-26.997	-71.03	47.8088	0.225278	0.117771
CIMAR-21	3	-26.997	-71.03	47.8598	0.229272	0.117797	14.944	34.752	206.253
CIMAR-21	3	-26.997	-71.03	47.8946	0.229262	0.117815
CIMAR-21	3	-26.997	-71.03	47.922	0.230699	0.11783
CIMAR-21	3	-26.997	-71.03	47.9551	0.232439	0.117848
CIMAR-21	3	-26.997	-71.03	48.0064	0.235126	0.117876
CIMAR-21	3	-26.997	-71.03	48.0418	0.235113	0.117896
CIMAR-21	3	-26.997	-71.03	48.056	0.233906	0.117904
CIMAR-21	3	-26.997	-71.03	48.1077	0.229496	0.117956
CIMAR-21	3	-26.997	-71.03	48.1433	0.229483	0.117991
CIMAR-21	3	-26.997	-71.03	48.1709	0.230413	0.118019
CIMAR-21	3	-26.997	-71.03	48.2048	0.231573	0.118054
CIMAR-21	3	-26.997	-71.03	48.2552	0.233297	0.118106
CIMAR-21	3	-26.997	-71.03	48.2909	0.233302	0.118143
CIMAR-21	3	-26.997	-71.03	48.3053	0.233708	0.118158
CIMAR-21	3	-26.997	-71.03	48.3555	0.235109	0.117955
CIMAR-21	3	-26.997	-71.03	48.3902	0.235114	0.117815
CIMAR-21	3	-26.997	-71.03	48.4176	0.233872	0.117704
CIMAR-21	3	-26.997	-71.03	48.4516	0.232333	0.117568
CIMAR-21	3	-26.997	-71.03	48.5016	0.23007	0.117368
CIMAR-21	3	-26.997	-71.03	48.5373	0.23008	0.117225
CIMAR-21	3	-26.997	-71.03	48.5513	0.230706	0.117169
CIMAR-21	3	-26.997	-71.03	48.6014	0.232958	0.117269
CIMAR-21	3	-26.997	-71.03	48.6358	0.232967	0.117337
CIMAR-21	3	-26.997	-71.03	48.6634	0.235993	0.117392
CIMAR-21	3	-26.997	-71.03	48.697	0.23967	0.117457
CIMAR-21	3	-26.997	-71.03	48.7468	0.245118	0.117553
CIMAR-21	3	-26.997	-71.03	48.7815	0.245119	0.117621
CIMAR-21	3	-26.997	-71.03	48.7955	0.244357	0.117648
CIMAR-21	3	-26.997	-71.03	48.8458	0.241617	0.117473
CIMAR-21	3	-26.997	-71.03	48.8806	0.241618	0.117352	14.751	34.722	203.242
CIMAR-21	3	-26.997	-71.03	48.9085	0.241614	0.117254
CIMAR-21	3	-26.997	-71.03	48.9427	0.241608	0.117137
CIMAR-21	3	-26.997	-71.03	48.9937	0.241599	0.11696
CIMAR-21	3	-26.997	-71.03	49.0294	0.241598	0.116837
CIMAR-21	3	-26.997	-71.03	49.0439	0.242052	0.116787
CIMAR-21	3	-26.997	-71.03	49.095	0.243658	0.117004
CIMAR-21	3	-26.997	-71.03	49.1298	0.243657	0.117152
CIMAR-21	3	-26.997	-71.03	49.1565	0.243754	0.117265
CIMAR-21	3	-26.997	-71.03	49.19	0.243884	0.117408
CIMAR-21	3	-26.997	-71.03	49.2403	0.24408	0.117622
CIMAR-21	3	-26.997	-71.03	49.2755	0.244088	0.117772
CIMAR-21	3	-26.997	-71.03	49.2894	0.243819	0.117831
CIMAR-21	3	-26.997	-71.03	49.3396	0.242844	0.117907
CIMAR-21	3	-26.997	-71.03	49.3743	0.242851	0.11796
CIMAR-21	3	-26.997	-71.03	49.4022	0.243771	0.118002
CIMAR-21	3	-26.997	-71.03	49.4361	0.244888	0.118052
CIMAR-21	3	-26.997	-71.03	49.4872	0.246567	0.118128
CIMAR-21	3	-26.997	-71.03	49.5225	0.24657	0.11818
CIMAR-21	3	-26.997	-71.03	49.5368	0.247033	0.118201
CIMAR-21	3	-26.997	-71.03	49.587	0.248666	0.118198
CIMAR-21	3	-26.997	-71.03	49.6215	0.248668	0.118196
CIMAR-21	3	-26.997	-71.03	49.6492	0.246994	0.118195
CIMAR-21	3	-26.997	-71.03	49.6828	0.244952	0.118192
CIMAR-21	3	-26.997	-71.03	49.7338	0.241861	0.118188
CIMAR-21	3	-26.997	-71.03	49.7696	0.241857	0.118185
CIMAR-21	3	-26.997	-71.03	49.7839	0.240437	0.118184
CIMAR-21	3	-26.997	-71.03	49.8335	0.235517	0.117927
CIMAR-21	3	-26.997	-71.03	49.8675	0.235513	0.117751
CIMAR-21	3	-26.997	-71.03	49.895	0.23576	0.117608	14.699	34.714	201.879
CIMAR-21	3	-26.997	-71.03	49.9286	0.236067	0.117435
CIMAR-21	3	-26.997	-71.03	49.9792	0.236529	0.117174
CIMAR-21	3	-26.997	-71.03	50.0141	0.23653	0.116994
CIMAR-21	3	-26.997	-71.03	50.0284	0.238089	0.11692
CIMAR-21	3	-26.997	-71.03	50.079	0.243611	0.11721
CIMAR-21	3	-26.997	-71.03	50.1142	0.243613	0.117411
CIMAR-21	3	-26.997	-71.03	50.1409	0.24332	0.117563
CIMAR-21	3	-26.997	-71.03	50.1731	0.242961	0.117748
CIMAR-21	3	-26.997	-71.03	50.223	0.242403	0.118033
CIMAR-21	3	-26.997	-71.03	50.2578	0.242398	0.118232
CIMAR-21	3	-26.997	-71.03	50.2719	0.24498	0.118313
CIMAR-21	3	-26.997	-71.03	50.3223	0.254153	0.118242
CIMAR-21	3	-26.997	-71.03	50.3568	0.254148	0.118193
CIMAR-21	3	-26.997	-71.03	50.3844	0.251008	0.118155
CIMAR-21	3	-26.997	-71.03	50.4186	0.24713	0.118107
CIMAR-21	3	-26.997	-71.03	50.4695	0.241342	0.118036
CIMAR-21	3	-26.997	-71.03	50.5046	0.241341	0.117987
CIMAR-21	3	-26.997	-71.03	50.519	0.242149	0.117967
CIMAR-21	3	-26.997	-71.03	50.5705	0.245047	0.118513
CIMAR-21	3	-26.997	-71.03	50.6048	0.245046	0.118876
CIMAR-21	3	-26.997	-71.03	50.6321	0.243494	0.119165
CIMAR-21	3	-26.997	-71.03	50.6656	0.241604	0.119522
CIMAR-21	3	-26.997	-71.03	50.716	0.238759	0.120058
CIMAR-21	3	-26.997	-71.03	50.7515	0.238769	0.120437
CIMAR-21	3	-26.997	-71.03	50.7662	0.239353	0.120593
CIMAR-21	3	-26.997	-71.03	50.8162	0.241348	0.120873
CIMAR-21	3	-26.997	-71.03	50.8509	0.241358	0.121067
CIMAR-21	3	-26.997	-71.03	50.8786	0.241861	0.121221
CIMAR-21	3	-26.997	-71.03	50.9121	0.242463	0.121407	14.675	34.71	200.749	7.033	1.103
CIMAR-21	3	-26.997	-71.03	50.9641	0.243396	0.121693
CIMAR-21	3	-26.997	-71.03	51	0.243398	0.121891
CIMAR-21	3	-26.997	-71.03	51.0142	0.243274	0.121969
CIMAR-21	3	-26.997	-71.03	51.0655	0.24283	0.123198
CIMAR-21	3	-26.997	-71.03	51.101	0.242832	0.124049
CIMAR-21	3	-26.997	-71.03	51.1287	0.244051	0.124715
CIMAR-21	3	-26.997	-71.03	51.1624	0.245538	0.125525
CIMAR-21	3	-26.997	-71.03	51.2127	0.247752	0.126733
CIMAR-21	3	-26.997	-71.03	51.2478	0.247756	0.127577
CIMAR-21	3	-26.997	-71.03	51.262	0.249363	0.127919
CIMAR-21	3	-26.997	-71.03	51.312	0.255017	0.12739
CIMAR-21	3	-26.997	-71.03	51.3464	0.255021	0.127025
CIMAR-21	3	-26.997	-71.03	51.3736	0.251705	0.126738
CIMAR-21	3	-26.997	-71.03	51.4071	0.247622	0.126386
CIMAR-21	3	-26.997	-71.03	51.4575	0.241482	0.125856
CIMAR-21	3	-26.997	-71.03	51.4924	0.241493	0.125488
CIMAR-21	3	-26.997	-71.03	51.5066	0.242562	0.125339
CIMAR-21	3	-26.997	-71.03	51.5573	0.246387	0.125214
CIMAR-21	3	-26.997	-71.03	51.5915	0.246398	0.125129
CIMAR-21	3	-26.997	-71.03	51.6189	0.244997	0.125061
CIMAR-21	3	-26.997	-71.03	51.6528	0.243242	0.124972
CIMAR-21	3	-26.997	-71.03	51.7027	0.240659	0.124842
CIMAR-21	3	-26.997	-71.03	51.7379	0.240645	0.12475
CIMAR-21	3	-26.997	-71.03	51.7521	0.241302	0.124713
CIMAR-21	3	-26.997	-71.03	51.8021	0.243606	0.124655
CIMAR-21	3	-26.997	-71.03	51.8365	0.243592	0.124615
CIMAR-21	3	-26.997	-71.03	51.8632	0.247647	0.124584
CIMAR-21	3	-26.997	-71.03	51.8963	0.252703	0.12455
CIMAR-21	3	-26.997	-71.03	51.9469	0.260431	0.124497	14.66	34.708	201.044
CIMAR-21	3	-26.997	-71.03	51.9813	0.26044	0.124461
CIMAR-21	3	-26.997	-71.03	51.9955	0.257944	0.124447
CIMAR-21	3	-26.997	-71.03	52.046	0.249074	0.124812
CIMAR-21	3	-26.997	-71.03	52.0802	0.249084	0.125059
CIMAR-21	3	-26.997	-71.03	52.1072	0.248931	0.125255
CIMAR-21	3	-26.997	-71.03	52.1402	0.248738	0.125491
CIMAR-21	3	-26.997	-71.03	52.1905	0.248444	0.125851
CIMAR-21	3	-26.997	-71.03	52.2258	0.248447	0.126104
CIMAR-21	3	-26.997	-71.03	52.24	0.24853	0.126205
CIMAR-21	3	-26.997	-71.03	52.29	0.248825	0.126373
CIMAR-21	3	-26.997	-71.03	52.3241	0.248827	0.126488
CIMAR-21	3	-26.997	-71.03	52.3511	0.249856	0.126579
CIMAR-21	3	-26.997	-71.03	52.385	0.251141	0.126694
CIMAR-21	3	-26.997	-71.03	52.4357	0.253068	0.126867
CIMAR-21	3	-26.997	-71.03	52.4704	0.253065	0.126985
CIMAR-21	3	-26.997	-71.03	52.4845	0.253951	0.127032
CIMAR-21	3	-26.997	-71.03	52.5343	0.257103	0.127295
CIMAR-21	3	-26.997	-71.03	52.5686	0.257101	0.127476
CIMAR-21	3	-26.997	-71.03	52.5956	0.255852	0.127618
CIMAR-21	3	-26.997	-71.03	52.6289	0.254317	0.127792
CIMAR-21	3	-26.997	-71.03	52.6798	0.251958	0.12806
CIMAR-21	3	-26.997	-71.03	52.7152	0.251954	0.128245
CIMAR-21	3	-26.997	-71.03	52.7294	0.252867	0.128319
CIMAR-21	3	-26.997	-71.03	52.7795	0.256096	0.12778
CIMAR-21	3	-26.997	-71.03	52.8139	0.256092	0.127411
CIMAR-21	3	-26.997	-71.03	52.8413	0.254787	0.127116	14.648	34.706	200.306
CIMAR-21	3	-26.997	-71.03	52.8748	0.253223	0.126761
CIMAR-21	3	-26.997	-71.03	52.9255	0.250855	0.126223
CIMAR-21	3	-26.997	-71.03	52.9609	0.250886	0.125846
CIMAR-21	3	-26.997	-71.03	52.9752	0.25064	0.125695
CIMAR-21	3	-26.997	-71.03	53.0257	0.249774	0.125795
CIMAR-21	3	-26.997	-71.03	53.06	0.249804	0.125862
CIMAR-21	3	-26.997	-71.03	53.087	0.249696	0.125916
CIMAR-21	3	-26.997	-71.03	53.1203	0.249515	0.125975
CIMAR-21	3	-26.997	-71.03	53.1714	0.249237	0.126066
CIMAR-21	3	-26.997	-71.03	53.2064	0.249217	0.126128
CIMAR-21	3	-26.997	-71.03	53.2205	0.252314	0.126153
CIMAR-21	3	-26.997	-71.03	53.2715	0.26347	0.125598
CIMAR-21	3	-26.997	-71.03	53.3059	0.26345	0.125224
CIMAR-21	3	-26.997	-71.03	53.3334	0.259632	0.124926
CIMAR-21	3	-26.997	-71.03	53.367	0.254969	0.124562
CIMAR-21	3	-26.997	-71.03	53.4177	0.24796	0.124015
CIMAR-21	3	-26.997	-71.03	53.4521	0.247958	0.123644
CIMAR-21	3	-26.997	-71.03	53.466	0.248831	0.123494
CIMAR-21	3	-26.997	-71.03	53.5163	0.251997	0.123639
CIMAR-21	3	-26.997	-71.03	53.5509	0.251996	0.123739
CIMAR-21	3	-26.997	-71.03	53.5781	0.252041	0.123817
CIMAR-21	3	-26.997	-71.03	53.6121	0.252106	0.123917
CIMAR-21	3	-26.997	-71.03	53.6639	0.252205	0.124069
CIMAR-21	3	-26.997	-71.03	53.6995	0.252213	0.124173
CIMAR-21	3	-26.997	-71.03	53.7138	0.250563	0.124215
CIMAR-21	3	-26.997	-71.03	53.7643	0.244736	0.124176
CIMAR-21	3	-26.997	-71.03	53.7987	0.244743	0.124149
CIMAR-21	3	-26.997	-71.03	53.8266	0.247194	0.124128	14.645	34.706	199.705
CIMAR-21	3	-26.997	-71.03	53.8603	0.250153	0.1241
CIMAR-21	3	-26.997	-71.03	53.9103	0.254544	0.12406
CIMAR-21	3	-26.997	-71.03	53.9459	0.25454	0.124031
CIMAR-21	3	-26.997	-71.03	53.9605	0.252793	0.124019
CIMAR-21	3	-26.997	-71.03	54.0121	0.246584	0.124325
CIMAR-21	3	-26.997	-71.03	54.0471	0.24658	0.124533
CIMAR-21	3	-26.997	-71.03	54.0752	0.247273	0.124699
CIMAR-21	3	-26.997	-71.03	54.109	0.248111	0.124899
CIMAR-21	3	-26.997	-71.03	54.1597	0.249366	0.125198
CIMAR-21	3	-26.997	-71.03	54.1945	0.249361	0.125404
CIMAR-21	3	-26.997	-71.03	54.2086	0.248935	0.125487
CIMAR-21	3	-26.997	-71.03	54.2587	0.24742	0.125051
CIMAR-21	3	-26.997	-71.03	54.2928	0.247416	0.124755
CIMAR-21	3	-26.997	-71.03	54.32	0.24856	0.124519
CIMAR-21	3	-26.997	-71.03	54.3538	0.250002	0.124228
CIMAR-21	3	-26.997	-71.03	54.4053	0.252193	0.123785
CIMAR-21	3	-26.997	-71.03	54.4412	0.252205	0.123475
CIMAR-21	3	-26.997	-71.03	54.4556	0.252288	0.123351
CIMAR-21	3	-26.997	-71.03	54.5058	0.252576	0.123194
CIMAR-21	3	-26.997	-71.03	54.5399	0.252587	0.123086
CIMAR-21	3	-26.997	-71.03	54.5671	0.252432	0.123001
CIMAR-21	3	-26.997	-71.03	54.6005	0.252228	0.122894
CIMAR-21	3	-26.997	-71.03	54.651	0.251921	0.122732
CIMAR-21	3	-26.997	-71.03	54.6852	0.251919	0.122622
CIMAR-21	3	-26.997	-71.03	54.6991	0.253482	0.122577
CIMAR-21	3	-26.997	-71.03	54.7501	0.259197	0.122602
CIMAR-21	3	-26.997	-71.03	54.7851	0.259195	0.122619
CIMAR-21	3	-26.997	-71.03	54.8117	0.258176	0.122631	14.642	34.704	199.432	7.277	1.1
CIMAR-21	3	-26.997	-71.03	54.8453	0.2569	0.122649
CIMAR-21	3	-26.997	-71.03	54.8959	0.254981	0.122675
CIMAR-21	3	-26.997	-71.03	54.9311	0.254992	0.122693
CIMAR-21	3	-26.997	-71.03	54.9453	0.253959	0.122701
CIMAR-21	3	-26.997	-71.03	54.9951	0.250327	0.122587
CIMAR-21	3	-26.997	-71.03	55.0292	0.250338	0.12251
CIMAR-21	3	-26.997	-71.03	55.057	0.250764	0.122447
CIMAR-21	3	-26.997	-71.03	55.0904	0.251268	0.12237
CIMAR-21	3	-26.997	-71.03	55.1414	0.252038	0.122253
CIMAR-21	3	-26.997	-71.03	55.1761	0.252041	0.122173
CIMAR-21	3	-26.997	-71.03	55.1903	0.2524	0.12214
CIMAR-21	3	-26.997	-71.03	55.2399	0.253652	0.121956
CIMAR-21	3	-26.997	-71.03	55.2741	0.253655	0.121829
CIMAR-21	3	-26.997	-71.03	55.3019	0.254088	0.121725
CIMAR-21	3	-26.997	-71.03	55.3361	0.254602	0.121598
CIMAR-21	3	-26.997	-71.03	55.3864	0.255361	0.12141
CIMAR-21	3	-26.997	-71.03	55.4211	0.255348	0.12128
CIMAR-21	3	-26.997	-71.03	55.4354	0.253394	0.121227
CIMAR-21	3	-26.997	-71.03	55.4862	0.246449	0.121472
CIMAR-21	3	-26.997	-71.03	55.5211	0.246436	0.12164
CIMAR-21	3	-26.997	-71.03	55.5482	0.248513	0.121771
CIMAR-21	3	-26.997	-71.03	55.5814	0.25109	0.121935
CIMAR-21	3	-26.997	-71.03	55.6326	0.255061	0.122188
CIMAR-21	3	-26.997	-71.03	55.6684	0.255086	0.122365
CIMAR-21	3	-26.997	-71.03	55.6826	0.256544	0.122435
CIMAR-21	3	-26.997	-71.03	55.7332	0.261726	0.122321
CIMAR-21	3	-26.997	-71.03	55.7671	0.26175	0.122245
CIMAR-21	3	-26.997	-71.03	55.7956	0.259723	0.12218
CIMAR-21	3	-26.997	-71.03	55.8295	0.257266	0.122098	14.629	34.703	199.14
CIMAR-21	3	-26.997	-71.03	55.8799	0.253617	0.121976
CIMAR-21	3	-26.997	-71.03	55.9146	0.253603	0.121891
CIMAR-21	3	-26.997	-71.03	55.9287	0.252319	0.121857
CIMAR-21	3	-26.997	-71.03	55.9791	0.247747	0.121924
CIMAR-21	3	-26.997	-71.03	56.0139	0.247733	0.12197
CIMAR-21	3	-26.997	-71.03	56.0416	0.247749	0.122006
CIMAR-21	3	-26.997	-71.03	56.075	0.247786	0.122053
CIMAR-21	3	-26.997	-71.03	56.1266	0.247842	0.122125
CIMAR-21	3	-26.997	-71.03	56.1622	0.247846	0.122175
CIMAR-21	3	-26.997	-71.03	56.176	0.247517	0.122194
CIMAR-21	3	-26.997	-71.03	56.2264	0.246312	0.122562
CIMAR-21	3	-26.997	-71.03	56.2611	0.246316	0.122815
CIMAR-21	3	-26.997	-71.03	56.2883	0.247209	0.123013
CIMAR-21	3	-26.997	-71.03	56.3217	0.248302	0.123255
CIMAR-21	3	-26.997	-71.03	56.3739	0.250012	0.123633
CIMAR-21	3	-26.997	-71.03	56.4084	0.250013	0.123884
CIMAR-21	3	-26.997	-71.03	56.4228	0.252463	0.123988
CIMAR-21	3	-26.997	-71.03	56.4737	0.261134	0.124198
CIMAR-21	3	-26.997	-71.03	56.5088	0.261136	0.124343
CIMAR-21	3	-26.997	-71.03	56.5359	0.260292	0.124455
CIMAR-21	3	-26.997	-71.03	56.5695	0.259242	0.124596
CIMAR-21	3	-26.997	-71.03	56.6192	0.257684	0.124805
CIMAR-21	3	-26.997	-71.03	56.6538	0.257683	0.124951
CIMAR-21	3	-26.997	-71.03	56.6678	0.255794	0.12501
CIMAR-21	3	-26.997	-71.03	56.7175	0.249094	0.125219
CIMAR-21	3	-26.997	-71.03	56.7516	0.249093	0.125363
CIMAR-21	3	-26.997	-71.03	56.7791	0.249653	0.125479
CIMAR-21	3	-26.997	-71.03	56.8131	0.250349	0.125621
CIMAR-21	3	-26.997	-71.03	56.8626	0.251361	0.125827	14.575	34.694	198.091
CIMAR-21	3	-26.997	-71.03	56.8972	0.251363	0.125972
CIMAR-21	3	-26.997	-71.03	56.9112	0.253185	0.12603
CIMAR-21	3	-26.997	-71.03	56.9611	0.25971	0.126084
CIMAR-21	3	-26.997	-71.03	56.9954	0.259711	0.126122
CIMAR-21	3	-26.997	-71.03	57.0235	0.256131	0.126152
CIMAR-21	3	-26.997	-71.03	57.057	0.251873	0.126188
CIMAR-21	3	-26.997	-71.03	57.1081	0.245378	0.126244
CIMAR-21	3	-26.997	-71.03	57.1427	0.245377	0.126281
CIMAR-21	3	-26.997	-71.03	57.1569	0.246574	0.126297
CIMAR-21	3	-26.997	-71.03	57.2075	0.250852	0.125887
CIMAR-21	3	-26.997	-71.03	57.2422	0.250851	0.125605
CIMAR-21	3	-26.997	-71.03	57.2693	0.249662	0.125386
CIMAR-21	3	-26.997	-71.03	57.3029	0.248197	0.125116
CIMAR-21	3	-26.997	-71.03	57.3554	0.245906	0.124693
CIMAR-21	3	-26.997	-71.03	57.3909	0.245911	0.124406
CIMAR-21	3	-26.997	-71.03	57.4051	0.248336	0.124292
CIMAR-21	3	-26.997	-71.03	57.455	0.256892	0.124361
CIMAR-21	3	-26.997	-71.03	57.4897	0.256897	0.124409
CIMAR-21	3	-26.997	-71.03	57.5167	0.256219	0.124447
CIMAR-21	3	-26.997	-71.03	57.5497	0.255386	0.124491
CIMAR-21	3	-26.997	-71.03	57.5995	0.254132	0.124558
CIMAR-21	3	-26.997	-71.03	57.6349	0.254132	0.124605
CIMAR-21	3	-26.997	-71.03	57.6491	0.253635	0.124624
CIMAR-21	3	-26.997	-71.03	57.6993	0.251889	0.124369
CIMAR-21	3	-26.997	-71.03	57.7337	0.251889	0.124194
CIMAR-21	3	-26.997	-71.03	57.761	0.251264	0.124056
CIMAR-21	3	-26.997	-71.03	57.7947	0.250512	0.123888
CIMAR-21	3	-26.997	-71.03	57.8454	0.249377	0.123636
CIMAR-21	3	-26.997	-71.03	57.8798	0.249397	0.123465	14.473	34.677	196.708
CIMAR-21	3	-26.997	-71.03	57.894	0.248714	0.123395
CIMAR-21	3	-26.997	-71.03	57.9444	0.246284	0.123183
CIMAR-21	3	-26.997	-71.03	57.9788	0.246304	0.123039
CIMAR-21	3	-26.997	-71.03	58.0048	0.24705	0.12293
CIMAR-21	3	-26.997	-71.03	58.0378	0.247958	0.122785
CIMAR-21	3	-26.997	-71.03	58.0874	0.249324	0.122568
CIMAR-21	3	-26.997	-71.03	58.1218	0.249307	0.122418
CIMAR-21	3	-26.997	-71.03	58.1356	0.248282	0.122357
CIMAR-21	3	-26.997	-71.03	58.1865	0.244517	0.122486
CIMAR-21	3	-26.997	-71.03	58.2209	0.2445	0.122574
CIMAR-21	3	-26.997	-71.03	58.2483	0.246167	0.122643
CIMAR-21	3	-26.997	-71.03	58.282	0.248226	0.12273
CIMAR-21	3	-26.997	-71.03	58.3323	0.251308	0.122859
CIMAR-21	3	-26.997	-71.03	58.3672	0.251304	0.122949
CIMAR-21	3	-26.997	-71.03	58.3816	0.251928	0.122986
CIMAR-21	3	-26.997	-71.03	58.4321	0.254125	0.122741
CIMAR-21	3	-26.997	-71.03	58.4666	0.25412	0.122573
CIMAR-21	3	-26.997	-71.03	58.4944	0.252475	0.122438
CIMAR-21	3	-26.997	-71.03	58.528	0.250493	0.122276
CIMAR-21	3	-26.997	-71.03	58.5791	0.247476	0.122028
CIMAR-21	3	-26.997	-71.03	58.6142	0.247474	0.121858
CIMAR-21	3	-26.997	-71.03	58.6283	0.248464	0.12179
CIMAR-21	3	-26.997	-71.03	58.6788	0.252007	0.121894
CIMAR-21	3	-26.997	-71.03	58.7132	0.252004	0.121965
CIMAR-21	3	-26.997	-71.03	58.7408	0.254008	0.122022
CIMAR-21	3	-26.997	-71.03	58.7748	0.256462	0.12209
CIMAR-21	3	-26.997	-71.03	58.8241	0.260033	0.12219
CIMAR-21	3	-26.997	-71.03	58.8585	0.260029	0.12226
CIMAR-21	3	-26.997	-71.03	58.8727	0.258525	0.122289	14.381	34.662	194.338
CIMAR-21	3	-26.997	-71.03	58.923	0.253231	0.122268
CIMAR-21	3	-26.997	-71.03	58.9573	0.253226	0.122254
CIMAR-21	3	-26.997	-71.03	58.984	0.25133	0.122242
CIMAR-21	3	-26.997	-71.03	59.0173	0.248996	0.122234
CIMAR-21	3	-26.997	-71.03	59.0675	0.245477	0.12222
CIMAR-21	3	-26.997	-71.03	59.102	0.245501	0.122211
CIMAR-21	3	-26.997	-71.03	59.1165	0.247052	0.122207
CIMAR-21	3	-26.997	-71.03	59.1671	0.252442	0.122199
CIMAR-21	3	-26.997	-71.03	59.2016	0.252465	0.122194
CIMAR-21	3	-26.997	-71.03	59.228	0.250904	0.12219
CIMAR-21	3	-26.997	-71.03	59.2603	0.248966	0.12218
CIMAR-21	3	-26.997	-71.03	59.3102	0.245967	0.122165
CIMAR-21	3	-26.997	-71.03	59.3451	0.245956	0.122154
CIMAR-21	3	-26.997	-71.03	59.3593	0.246555	0.12215
CIMAR-21	3	-26.997	-71.03	59.4093	0.24867	0.122112
CIMAR-21	3	-26.997	-71.03	59.4435	0.248659	0.122087
CIMAR-21	3	-26.997	-71.03	59.4703	0.250529	0.122066
CIMAR-21	3	-26.997	-71.03	59.5034	0.252867	0.122044
CIMAR-21	3	-26.997	-71.03	59.5541	0.256437	0.122009
CIMAR-21	3	-26.997	-71.03	59.5893	0.256444	0.121985
CIMAR-21	3	-26.997	-71.03	59.6034	0.254356	0.121976
CIMAR-21	3	-26.997	-71.03	59.6532	0.246979	0.122105
CIMAR-21	3	-26.997	-71.03	59.6881	0.246987	0.122195
CIMAR-21	3	-26.997	-71.03	59.7156	0.247497	0.122267
CIMAR-21	3	-26.997	-71.03	59.7489	0.248106	0.122352
CIMAR-21	3	-26.997	-71.03	59.8001	0.24904	0.122482
CIMAR-21	3	-26.997	-71.03	59.8356	0.249037	0.122573	14.333	34.655	194.179	7.153	1.112
CIMAR-21	3	-26.997	-71.03	59.8496	0.24786	0.122608
CIMAR-21	3	-26.997	-71.03	59.8999	0.243611	0.122928
CIMAR-21	3	-26.997	-71.03	59.9344	0.243608	0.123148
CIMAR-21	3	-26.997	-71.03	59.9617	0.24542	0.123321
CIMAR-21	3	-26.997	-71.03	59.9956	0.247678	0.123538
CIMAR-21	3	-26.997	-71.03	60.0473	0.25113	0.123869
CIMAR-21	3	-26.997	-71.03	60.083	0.251138	0.124098
CIMAR-21	3	-26.997	-71.03	60.0971	0.251476	0.124188
CIMAR-21	3	-26.997	-71.03	60.1478	0.25269	0.124418
CIMAR-21	3	-26.997	-71.03	60.1823	0.252697	0.124573
CIMAR-21	3	-26.997	-71.03	60.2102	0.25338	0.1247
CIMAR-21	3	-26.997	-71.03	60.2442	0.254207	0.124853
CIMAR-21	3	-26.997	-71.03	60.2945	0.255432	0.125079
CIMAR-21	3	-26.997	-71.03	60.3302	0.255438	0.12524
CIMAR-21	3	-26.997	-71.03	60.3445	0.253464	0.125305
CIMAR-21	3	-26.997	-71.03	60.3949	0.246484	0.125197
CIMAR-21	3	-26.997	-71.03	60.4297	0.246489	0.125123
CIMAR-21	3	-26.997	-71.03	60.4571	0.246924	0.125064
CIMAR-21	3	-26.997	-71.03	60.4905	0.247437	0.124991
CIMAR-21	3	-26.997	-71.03	60.5411	0.248214	0.12488
CIMAR-21	3	-26.997	-71.03	60.5765	0.248205	0.124802
CIMAR-21	3	-26.997	-71.03	60.5908	0.249716	0.124771
CIMAR-21	3	-26.997	-71.03	60.6418	0.255127	0.124543
CIMAR-21	3	-26.997	-71.03	60.6762	0.255118	0.124388
CIMAR-21	3	-26.997	-71.03	60.7036	0.253679	0.124266
CIMAR-21	3	-26.997	-71.03	60.7371	0.251924	0.124117
CIMAR-21	3	-26.997	-71.03	60.7874	0.249292	0.123894
CIMAR-21	3	-26.997	-71.03	60.8226	0.249294	0.123738
CIMAR-21	3	-26.997	-71.03	60.8367	0.250572	0.123675	14.313	34.652	192.845
CIMAR-21	3	-26.997	-71.03	60.8873	0.255149	0.123545
CIMAR-21	3	-26.997	-71.03	60.9219	0.255151	0.123457
CIMAR-21	3	-26.997	-71.03	60.9499	0.252527	0.123385
CIMAR-21	3	-26.997	-71.03	60.9837	0.249346	0.123297
CIMAR-21	3	-26.997	-71.03	61.0337	0.244644	0.123167
CIMAR-21	3	-26.997	-71.03	61.0691	0.244638	0.123075
CIMAR-21	3	-26.997	-71.03	61.0832	0.246247	0.123039
CIMAR-21	3	-26.997	-71.03	61.1336	0.252007	0.122843
CIMAR-21	3	-26.997	-71.03	61.168	0.252001	0.12271
CIMAR-21	3	-26.997	-71.03	61.196	0.252	0.122601
CIMAR-21	3	-26.997	-71.03	61.2297	0.252025	0.122475
CIMAR-21	3	-26.997	-71.03	61.2805	0.252063	0.122285
CIMAR-21	3	-26.997	-71.03	61.3158	0.252084	0.122152
CIMAR-21	3	-26.997	-71.03	61.3304	0.252749	0.122097
CIMAR-21	3	-26.997	-71.03	61.3813	0.255059	0.122052
CIMAR-21	3	-26.997	-71.03	61.4162	0.25508	0.12202
CIMAR-21	3	-26.997	-71.03	61.4445	0.255044	0.121995
CIMAR-21	3	-26.997	-71.03	61.4782	0.254972	0.12196
CIMAR-21	3	-26.997	-71.03	61.5296	0.254864	0.121907
CIMAR-21	3	-26.997	-71.03	61.565	0.254856	0.12187
CIMAR-21	3	-26.997	-71.03	61.5795	0.256166	0.121855
CIMAR-21	3	-26.997	-71.03	61.6293	0.260689	0.121701
CIMAR-21	3	-26.997	-71.03	61.6639	0.260681	0.121593
CIMAR-21	3	-26.997	-71.03	61.6922	0.25918	0.121506
CIMAR-21	3	-26.997	-71.03	61.7262	0.257387	0.121401
CIMAR-21	3	-26.997	-71.03	61.7768	0.254725	0.121246
CIMAR-21	3	-26.997	-71.03	61.8115	0.254728	0.12114
CIMAR-21	3	-26.997	-71.03	61.8257	0.253515	0.121096
CIMAR-21	3	-26.997	-71.03	61.8756	0.249258	0.121543	14.059	34.614	188.437
CIMAR-21	3	-26.997	-71.03	61.9099	0.249261	0.12185
CIMAR-21	3	-26.997	-71.03	61.9369	0.25328	0.122092
CIMAR-21	3	-26.997	-71.03	61.9708	0.258302	0.122395
CIMAR-21	3	-26.997	-71.03	62.0208	0.265717	0.122842
CIMAR-21	3	-26.997	-71.03	62.0562	0.265715	0.123158
CIMAR-21	3	-26.997	-71.03	62.0705	0.263	0.123286
CIMAR-21	3	-26.997	-71.03	62.1207	0.253504	0.122937
CIMAR-21	3	-26.997	-71.03	62.1552	0.253501	0.122696
CIMAR-21	3	-26.997	-71.03	62.1828	0.255257	0.122503
CIMAR-21	3	-26.997	-71.03	62.2165	0.257413	0.122271
CIMAR-21	3	-26.997	-71.03	62.268	0.260707	0.121916
CIMAR-21	3	-26.997	-71.03	62.3046	0.260719	0.121663
CIMAR-21	3	-26.997	-71.03	62.3187	0.26172	0.121567
CIMAR-21	3	-26.997	-71.03	62.3693	0.265337	0.121579
CIMAR-21	3	-26.997	-71.03	62.4041	0.265349	0.121587
CIMAR-21	3	-26.997	-71.03	62.4316	0.266114	0.121594
CIMAR-21	3	-26.997	-71.03	62.4652	0.267032	0.121599
CIMAR-21	3	-26.997	-71.03	62.5156	0.268408	0.121606
CIMAR-21	3	-26.997	-71.03	62.5512	0.268402	0.121612
CIMAR-21	3	-26.997	-71.03	62.5657	0.267998	0.121614
CIMAR-21	3	-26.997	-71.03	62.6164	0.266593	0.121776
CIMAR-21	3	-26.997	-71.03	62.6507	0.266587	0.121886
CIMAR-21	3	-26.997	-71.03	62.6778	0.268076	0.121973
CIMAR-21	3	-26.997	-71.03	62.7111	0.269914	0.122082
CIMAR-21	3	-26.997	-71.03	62.7621	0.272732	0.122249
CIMAR-21	3	-26.997	-71.03	62.7976	0.272742	0.122366
CIMAR-21	3	-26.997	-71.03	62.812	0.271465	0.122413
CIMAR-21	3	-26.997	-71.03	62.863	0.266941	0.122242	13.861	34.587	183.625
CIMAR-21	3	-26.997	-71.03	62.8976	0.266951	0.122127
CIMAR-21	3	-26.997	-71.03	62.923	0.269005	0.122042
CIMAR-21	3	-26.997	-71.03	62.9551	0.271597	0.121932
CIMAR-21	3	-26.997	-71.03	63.0063	0.275731	0.121759
CIMAR-21	3	-26.997	-71.03	63.0406	0.27573	0.121642
CIMAR-21	3	-26.997	-71.03	63.0547	0.274994	0.121594
CIMAR-21	3	-26.997	-71.03	63.1048	0.272363	0.12157
CIMAR-21	3	-26.997	-71.03	63.1387	0.272362	0.121554
CIMAR-21	3	-26.997	-71.03	63.1651	0.274587	0.121541
CIMAR-21	3	-26.997	-71.03	63.1981	0.277357	0.121525
CIMAR-21	3	-26.997	-71.03	63.2487	0.281605	0.121499
CIMAR-21	3	-26.997	-71.03	63.2832	0.281599	0.121481
CIMAR-21	3	-26.997	-71.03	63.2974	0.280195	0.121474
CIMAR-21	3	-26.997	-71.03	63.3477	0.275236	0.121216
CIMAR-21	3	-26.997	-71.03	63.3823	0.27523	0.121039
CIMAR-21	3	-26.997	-71.03	63.4098	0.277792	0.120897
CIMAR-21	3	-26.997	-71.03	63.4431	0.280911	0.12073
CIMAR-21	3	-26.997	-71.03	63.4946	0.28574	0.120471
CIMAR-21	3	-26.997	-71.03	63.5296	0.285761	0.120295
CIMAR-21	3	-26.997	-71.03	63.5441	0.285616	0.120222
CIMAR-21	3	-26.997	-71.03	63.5945	0.285115	0.120707
CIMAR-21	3	-26.997	-71.03	63.6293	0.285136	0.121042
CIMAR-21	3	-26.997	-71.03	63.6571	0.286176	0.121309
CIMAR-21	3	-26.997	-71.03	63.6905	0.287402	0.121628
CIMAR-21	3	-26.997	-71.03	63.7409	0.289249	0.122107
CIMAR-21	3	-26.997	-71.03	63.7763	0.289242	0.122444
CIMAR-21	3	-26.997	-71.03	63.7904	0.288593	0.122579
CIMAR-21	3	-26.997	-71.03	63.8408	0.286277	0.123033	13.645	34.557	176.013	7.632	1.117
CIMAR-21	3	-26.997	-71.03	63.8749	0.286271	0.12334
CIMAR-21	3	-26.997	-71.03	63.902	0.290005	0.123585
CIMAR-21	3	-26.997	-71.03	63.9359	0.294661	0.12389
CIMAR-21	3	-26.997	-71.03	63.986	0.301569	0.124342
CIMAR-21	3	-26.997	-71.03	64.0206	0.301568	0.124655
CIMAR-21	3	-26.997	-71.03	64.0349	0.302934	0.124783
CIMAR-21	3	-26.997	-71.03	64.0855	0.307781	0.124596
CIMAR-21	3	-26.997	-71.03	64.1205	0.307781	0.124466
CIMAR-21	3	-26.997	-71.03	64.1477	0.306678	0.124365
CIMAR-21	3	-26.997	-71.03	64.1814	0.305311	0.12424
CIMAR-21	3	-26.997	-71.03	64.2322	0.303251	0.124051
CIMAR-21	3	-26.997	-71.03	64.2679	0.30325	0.123919
CIMAR-21	3	-26.997	-71.03	64.2822	0.303979	0.123866
CIMAR-21	3	-26.997	-71.03	64.3327	0.306546	0.123718
CIMAR-21	3	-26.997	-71.03	64.3677	0.306545	0.123616
CIMAR-21	3	-26.997	-71.03	64.3954	0.306951	0.123535
CIMAR-21	3	-26.997	-71.03	64.4297	0.307455	0.123435
CIMAR-21	3	-26.997	-71.03	64.4797	0.308186	0.12329
CIMAR-21	3	-26.997	-71.03	64.5146	0.308184	0.123189
CIMAR-21	3	-26.997	-71.03	64.5287	0.308333	0.123148
CIMAR-21	3	-26.997	-71.03	64.5792	0.308864	0.12323
CIMAR-21	3	-26.997	-71.03	64.6139	0.308862	0.123286
CIMAR-21	3	-26.997	-71.03	64.6417	0.309944	0.123331
CIMAR-21	3	-26.997	-71.03	64.6756	0.311268	0.123385
CIMAR-21	3	-26.997	-71.03	64.7252	0.313213	0.123465
CIMAR-21	3	-26.997	-71.03	64.7604	0.313211	0.123521
CIMAR-21	3	-26.997	-71.03	64.7747	0.311587	0.123543
CIMAR-21	3	-26.997	-71.03	64.8247	0.305859	0.12345	13.508	34.55	170.432
CIMAR-21	3	-26.997	-71.03	64.859	0.305857	0.123386
CIMAR-21	3	-26.997	-71.03	64.8874	0.305575	0.123332
CIMAR-21	3	-26.997	-71.03	64.9218	0.305242	0.123269
CIMAR-21	3	-26.997	-71.03	64.9718	0.304756	0.123178
CIMAR-21	3	-26.997	-71.03	65.0077	0.304761	0.123113
CIMAR-21	3	-26.997	-71.03	65.0218	0.304533	0.123087
CIMAR-21	3	-26.997	-71.03	65.0725	0.303712	0.122937
CIMAR-21	3	-26.997	-71.03	65.1067	0.303717	0.122836
CIMAR-21	3	-26.997	-71.03	65.1345	0.304222	0.122754
CIMAR-21	3	-26.997	-71.03	65.1682	0.304837	0.122654
CIMAR-21	3	-26.997	-71.03	65.2196	0.305775	0.122502
CIMAR-21	3	-26.997	-71.03	65.2556	0.305782	0.122395
CIMAR-21	3	-26.997	-71.03	65.2698	0.30672	0.122353
CIMAR-21	3	-26.997	-71.03	65.3213	0.310107	0.122447
CIMAR-21	3	-26.997	-71.03	65.3559	0.310114	0.122511
CIMAR-21	3	-26.997	-71.03	65.3834	0.309458	0.122561
CIMAR-21	3	-26.997	-71.03	65.417	0.308653	0.122622
CIMAR-21	3	-26.997	-71.03	65.4684	0.307418	0.122715
CIMAR-21	3	-26.997	-71.03	65.5035	0.307418	0.122779
CIMAR-21	3	-26.997	-71.03	65.5178	0.30962	0.122804
CIMAR-21	3	-26.997	-71.03	65.569	0.317475	0.122765
CIMAR-21	3	-26.997	-71.03	65.6039	0.317475	0.122737
CIMAR-21	3	-26.997	-71.03	65.6313	0.315588	0.122716
CIMAR-21	3	-26.997	-71.03	65.6647	0.313279	0.122689
CIMAR-21	3	-26.997	-71.03	65.7139	0.309878	0.122649
CIMAR-21	3	-26.997	-71.03	65.7487	0.309871	0.122621
CIMAR-21	3	-26.997	-71.03	65.7631	0.311438	0.122609
CIMAR-21	3	-26.997	-71.03	65.8132	0.316912	0.122915	13.504	34.553	168.976
CIMAR-21	3	-26.997	-71.03	65.8478	0.316905	0.123126
CIMAR-21	3	-26.997	-71.03	65.875	0.316274	0.123293
CIMAR-21	3	-26.997	-71.03	65.9086	0.315503	0.123499
CIMAR-21	3	-26.997	-71.03	65.9591	0.314345	0.123808
CIMAR-21	3	-26.997	-71.03	65.9944	0.314345	0.124024
CIMAR-21	3	-26.997	-71.03	66.0085	0.314993	0.124111
CIMAR-21	3	-26.997	-71.03	66.0595	0.317335	0.12384
CIMAR-21	3	-26.997	-71.03	66.0944	0.317335	0.123655
CIMAR-21	3	-26.997	-71.03	66.1222	0.316487	0.123508
CIMAR-21	3	-26.997	-71.03	66.1565	0.315461	0.12333
CIMAR-21	3	-26.997	-71.03	66.2071	0.313951	0.123068
CIMAR-21	3	-26.997	-71.03	66.2421	0.313973	0.122886
CIMAR-21	3	-26.997	-71.03	66.2563	0.314453	0.122812
CIMAR-21	3	-26.997	-71.03	66.3068	0.31615	0.122821
CIMAR-21	3	-26.997	-71.03	66.3405	0.316172	0.122827
CIMAR-21	3	-26.997	-71.03	66.3677	0.316409	0.122831
CIMAR-21	3	-26.997	-71.03	66.4011	0.316665	0.122831
CIMAR-21	3	-26.997	-71.03	66.4515	0.317051	0.122832
CIMAR-21	3	-26.997	-71.03	66.4869	0.317035	0.122832
CIMAR-21	3	-26.997	-71.03	66.5014	0.315827	0.122832
CIMAR-21	3	-26.997	-71.03	66.5523	0.311579	0.123083
CIMAR-21	3	-26.997	-71.03	66.5869	0.311565	0.123254
CIMAR-21	3	-26.997	-71.03	66.6151	0.310824	0.123393
CIMAR-21	3	-26.997	-71.03	66.6492	0.309939	0.123561
CIMAR-21	3	-26.997	-71.03	66.699	0.308641	0.123806
CIMAR-21	3	-26.997	-71.03	66.7344	0.30863	0.123981
CIMAR-21	3	-26.997	-71.03	66.7484	0.309827	0.12405
CIMAR-21	3	-26.997	-71.03	66.7982	0.314095	0.124049
CIMAR-21	3	-26.997	-71.03	66.8324	0.314084	0.124049	13.504	34.554	168.514
CIMAR-21	3	-26.997	-71.03	66.8594	0.313794	0.124049
CIMAR-21	3	-26.997	-71.03	66.8927	0.313454	0.124052
CIMAR-21	3	-26.997	-71.03	66.9429	0.312942	0.124056
CIMAR-21	3	-26.997	-71.03	66.9775	0.312949	0.124058
CIMAR-21	3	-26.997	-71.03	66.9919	0.314727	0.124059
CIMAR-21	3	-26.997	-71.03	67.0418	0.320857	0.124062
CIMAR-21	3	-26.997	-71.03	67.0756	0.320864	0.124064
CIMAR-21	3	-26.997	-71.03	67.1034	0.321601	0.124065
CIMAR-21	3	-26.997	-71.03	67.1373	0.322505	0.124068
CIMAR-21	3	-26.997	-71.03	67.1868	0.323825	0.124071
CIMAR-21	3	-26.997	-71.03	67.2212	0.323834	0.124073
CIMAR-21	3	-26.997	-71.03	67.2352	0.321748	0.124074
CIMAR-21	3	-26.997	-71.03	67.2852	0.31429	0.124041
CIMAR-21	3	-26.997	-71.03	67.3195	0.314299	0.124019
CIMAR-21	3	-26.997	-71.03	67.3468	0.316577	0.124001
CIMAR-21	3	-26.997	-71.03	67.3801	0.319343	0.123976
CIMAR-21	3	-26.997	-71.03	67.4319	0.323643	0.123938
CIMAR-21	3	-26.997	-71.03	67.4677	0.323635	0.123912
CIMAR-21	3	-26.997	-71.03	67.4817	0.322521	0.123902
CIMAR-21	3	-26.997	-71.03	67.5321	0.318521	0.124072
CIMAR-21	3	-26.997	-71.03	67.567	0.318514	0.12419
CIMAR-21	3	-26.997	-71.03	67.5945	0.320382	0.124282
CIMAR-21	3	-26.997	-71.03	67.6278	0.322649	0.124396
CIMAR-21	3	-26.997	-71.03	67.6783	0.326079	0.124568
CIMAR-21	3	-26.997	-71.03	67.7134	0.326075	0.124687
CIMAR-21	3	-26.997	-71.03	67.7272	0.326243	0.124734
CIMAR-21	3	-26.997	-71.03	67.7773	0.326851	0.124617
CIMAR-21	3	-26.997	-71.03	67.8117	0.326847	0.124537
CIMAR-21	3	-26.997	-71.03	67.8393	0.327033	0.124473	13.489	34.554	167.072	7.613	1.122
CIMAR-21	3	-26.997	-71.03	67.8728	0.327274	0.124395
CIMAR-21	3	-26.997	-71.03	67.9231	0.327638	0.12428
CIMAR-21	3	-26.997	-71.03	67.9575	0.327651	0.1242
CIMAR-21	3	-26.997	-71.03	67.9716	0.32476	0.124168
CIMAR-21	3	-26.997	-71.03	68.0218	0.314368	0.124811
CIMAR-21	3	-26.997	-71.03	68.0562	0.314381	0.125251
CIMAR-21	3	-26.997	-71.03	68.0829	0.317933	0.125593
CIMAR-21	3	-26.997	-71.03	68.116	0.322304	0.126016
CIMAR-21	3	-26.997	-71.03	68.1673	0.329096	0.126673
CIMAR-21	3	-26.997	-71.03	68.2025	0.3291	0.127123
CIMAR-21	3	-26.997	-71.03	68.2169	0.328042	0.127307
CIMAR-21	3	-26.997	-71.03	68.2678	0.324303	0.126914
CIMAR-21	3	-26.997	-71.03	68.3025	0.324307	0.126646
CIMAR-21	3	-26.997	-71.03	68.3286	0.325832	0.126444
CIMAR-21	3	-26.997	-71.03	68.3613	0.327723	0.126189
CIMAR-21	3	-26.997	-71.03	68.4126	0.330691	0.125788
CIMAR-21	3	-26.997	-71.03	68.4477	0.33068	0.125515
CIMAR-21	3	-26.997	-71.03	68.4619	0.329447	0.125403
CIMAR-21	3	-26.997	-71.03	68.5142	0.324916	0.125435
CIMAR-21	3	-26.997	-71.03	68.5491	0.324906	0.125456
CIMAR-21	3	-26.997	-71.03	68.5768	0.326702	0.125472
CIMAR-21	3	-26.997	-71.03	68.6107	0.328915	0.125495
CIMAR-21	3	-26.997	-71.03	68.6611	0.33222	0.12553
CIMAR-21	3	-26.997	-71.03	68.6966	0.332237	0.125554
CIMAR-21	3	-26.997	-71.03	68.7109	0.332385	0.125564
CIMAR-21	3	-26.997	-71.03	68.7611	0.332907	0.125638
CIMAR-21	3	-26.997	-71.03	68.7958	0.332923	0.12569
CIMAR-21	3	-26.997	-71.03	68.8221	0.334823	0.125729
CIMAR-21	3	-26.997	-71.03	68.8556	0.337223	0.125777	13.484	34.553	166.827
CIMAR-21	3	-26.997	-71.03	68.9068	0.340894	0.12585
CIMAR-21	3	-26.997	-71.03	68.9421	0.340895	0.125901
CIMAR-21	3	-26.997	-71.03	68.9565	0.340963	0.125922
CIMAR-21	3	-26.997	-71.03	69.0066	0.341201	0.126127
CIMAR-21	3	-26.997	-71.03	69.0406	0.341202	0.126266
CIMAR-21	3	-26.997	-71.03	69.0677	0.342283	0.126378
CIMAR-21	3	-26.997	-71.03	69.1017	0.343627	0.126516
CIMAR-21	3	-26.997	-71.03	69.1548	0.345733	0.126732
CIMAR-21	3	-26.997	-71.03	69.19	0.345728	0.126876
CIMAR-21	3	-26.997	-71.03	69.2044	0.347817	0.126934
CIMAR-21	3	-26.997	-71.03	69.2546	0.355086	0.127123
CIMAR-21	3	-26.997	-71.03	69.2897	0.355081	0.127254
CIMAR-21	3	-26.997	-71.03	69.3165	0.356831	0.127354
CIMAR-21	3	-26.997	-71.03	69.3499	0.359029	0.127481
CIMAR-21	3	-26.997	-71.03	69.4006	0.362361	0.127673
CIMAR-21	3	-26.997	-71.03	69.4358	0.36237	0.127806
CIMAR-21	3	-26.997	-71.03	69.4497	0.362588	0.127859
CIMAR-21	3	-26.997	-71.03	69.5	0.363375	0.127883
CIMAR-21	3	-26.997	-71.03	69.5351	0.363384	0.127899
CIMAR-21	3	-26.997	-71.03	69.5633	0.363683	0.127912
CIMAR-21	3	-26.997	-71.03	69.5981	0.36405	0.127929
CIMAR-21	3	-26.997	-71.03	69.6492	0.364587	0.127954
CIMAR-21	3	-26.997	-71.03	69.6846	0.364593	0.127972
CIMAR-21	3	-26.997	-71.03	69.6987	0.365555	0.127978
CIMAR-21	3	-26.997	-71.03	69.7488	0.368973	0.128116
CIMAR-21	3	-26.997	-71.03	69.7828	0.368979	0.128209
CIMAR-21	3	-26.997	-71.03	69.8105	0.36942	0.128285
CIMAR-21	3	-26.997	-71.03	69.8447	0.369961	0.128378
CIMAR-21	3	-26.997	-71.03	69.894	0.370741	0.128511	13.48	34.552	166.869
CIMAR-21	3	-26.997	-71.03	69.9282	0.370743	0.128604
CIMAR-21	3	-26.997	-71.03	69.9424	0.370898	0.128642
CIMAR-21	3	-26.997	-71.03	69.9924	0.371445	0.128528
CIMAR-21	3	-26.997	-71.03	70.0266	0.371447	0.12845
CIMAR-21	3	-26.997	-71.03	70.0537	0.371647	0.128389
CIMAR-21	3	-26.997	-71.03	70.0876	0.371935	0.128317
CIMAR-21	3	-26.997	-71.03	70.1388	0.372367	0.128209
CIMAR-21	3	-26.997	-71.03	70.1734	0.372406	0.128135
CIMAR-21	3	-26.997	-71.03	70.1876	0.373126	0.128105
CIMAR-21	3	-26.997	-71.03	70.2379	0.375692	0.128004
[truncated: 6,531 more rows]
